# Supplementary material for: Azo derivatives of monoterpenes as anti-Helicobacter pylori agents: from synthesis to structure-based target investigation
Source: Royal Society of Chemistry journal article supplement (doi:10.1039/d4md00511b), 2024-10-09
Supplement: d4md00511b1.pdf [file d4md00511b1.pdf]

## SUPPLEMENTARY INFORMATION

### FOR

#### **Azo Derivatives of Monoterpenes as Anti-*Helicobacter pylori* Agents: from the Synthesis to a Structure-Based Target Investigation**

Francesco Melfi<sup>a,§</sup>, Marialuigia Fantacuzzi<sup>a,§</sup>, Simone Carradori<sup>a,\*</sup>, Ilaria D'Agostino<sup>b</sup>, Alessandra Ammazzorso<sup>a</sup>, Noemi Mencarelli<sup>a</sup>, Marialucia Gallorini<sup>a</sup>, Mattia Spano<sup>c</sup>, Paolo Guglielmi<sup>c</sup>,  
Mariangela Agamennone<sup>a</sup>, Sazan Haji Ali<sup>d,e</sup>, Ali Al-Samydai<sup>f</sup>, Francesca Sisto<sup>g</sup>

<sup>a</sup>Department of Pharmacy, "G. d'Annunzio" University of Chieti-Pescara, via dei Vestini 31, 66100 Chieti, Italy

<sup>b</sup>Department of Pharmacy, University of Pisa, Via Bonanno 6, 56126 Pisa, Italy

<sup>c</sup>Department of Drug Chemistry and Technology, "Sapienza" University of Rome, P.le Aldo Moro 5, 00185 Rome, Italy

<sup>d</sup>Department of Pharmaceutical Chemistry, College of Pharmacy, Hawler Medical University, Erbil 44000, Iraq

<sup>e</sup>Department of Pharmaceutical Chemistry, Faculty of Pharmacy, Anadolu University, Eskişehir, 26470, Turkey

<sup>f</sup>Pharmacological and Diagnostic Research Centre (PDRC), Faculty of Pharmacy, Al-Ahliyya Amman University, Amman-Jordan- Al Salt Road, Amman, 19328, Jordan

<sup>g</sup>Department of Biomedical, Surgical and Dental Sciences, University of Milan, Via Pascal 36, 20133 Milan, Italy

\*Corresponding author: Prof. Simone Carradori

§These authors contributed equally to the work.

## NMR and MS spectra for representative compounds

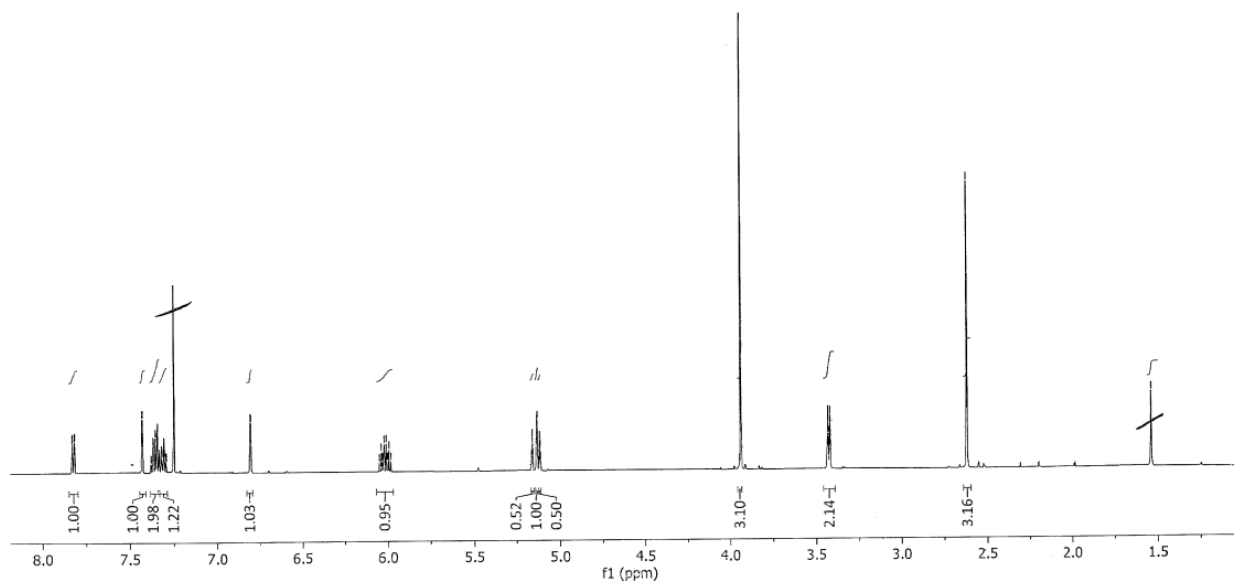

**Figure S1.** <sup>1</sup>H NMR spectrum of compound **1**.

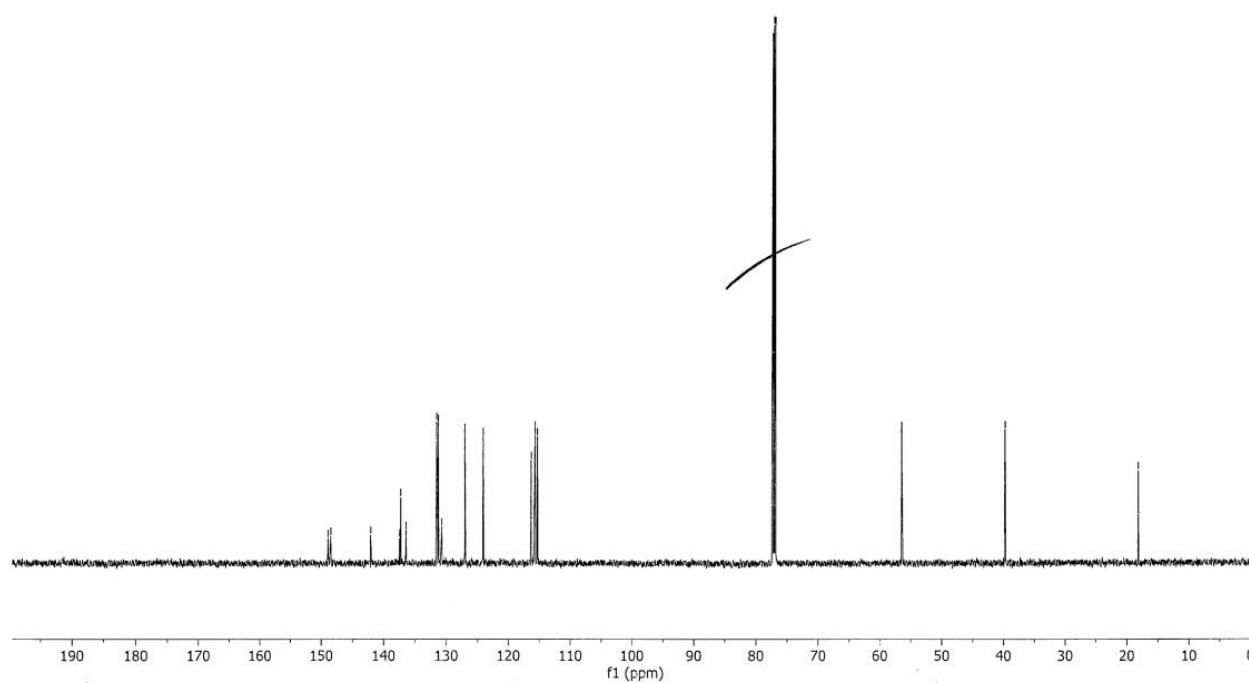

**Figure S2.** <sup>13</sup>C NMR spectrum of compound **1**.

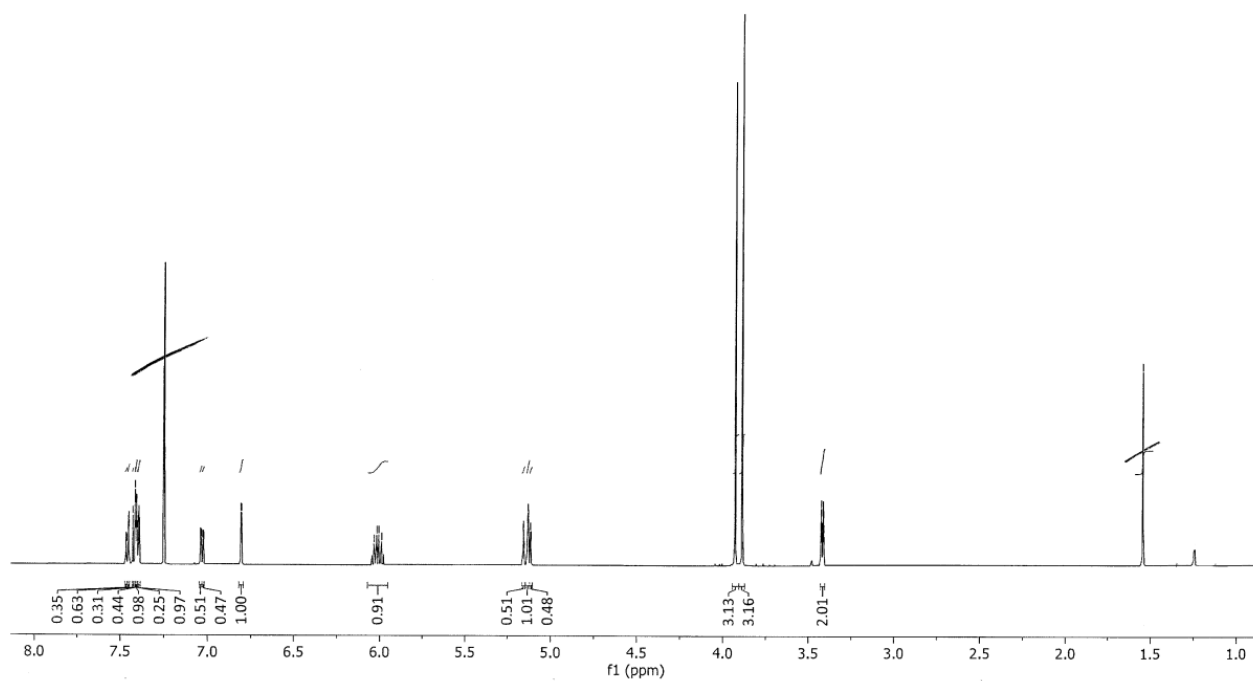

**Figure S3.**  $^1\text{H}$  NMR spectrum of compound **2**.

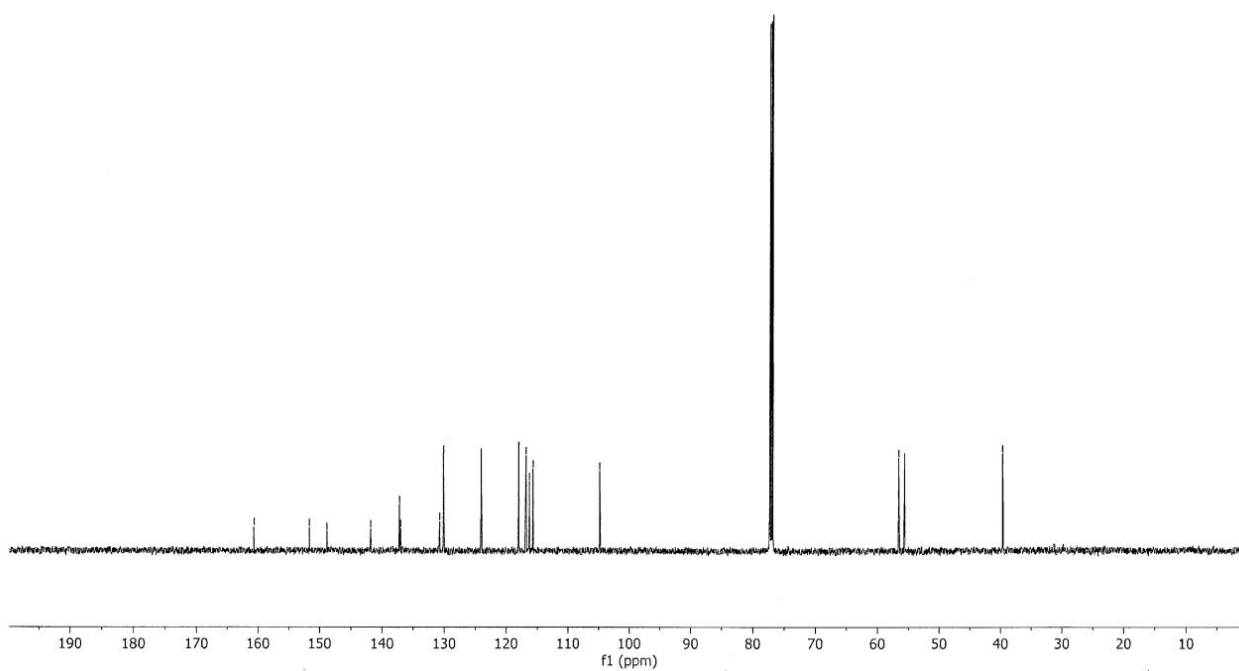

**Figure S4.**  $^{13}\text{C}$  NMR spectrum of compound **2**.

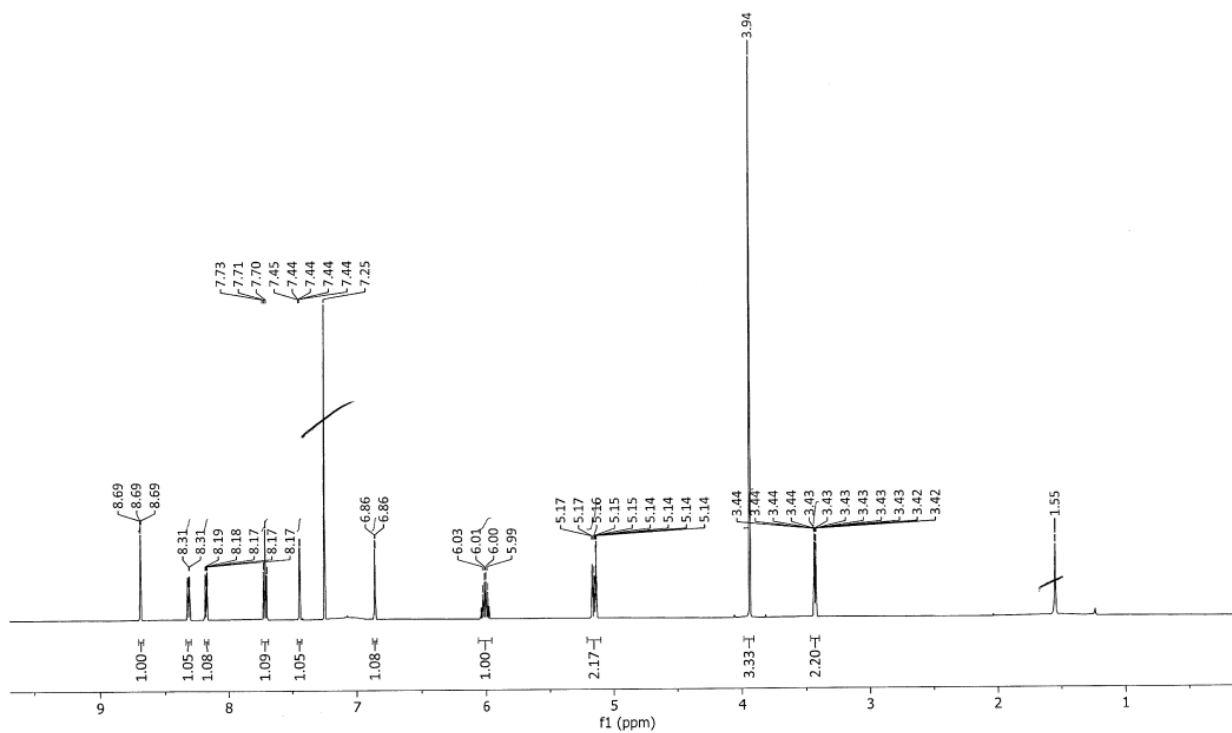

Figure S5. <sup>1</sup>H NMR spectrum of compound 3.

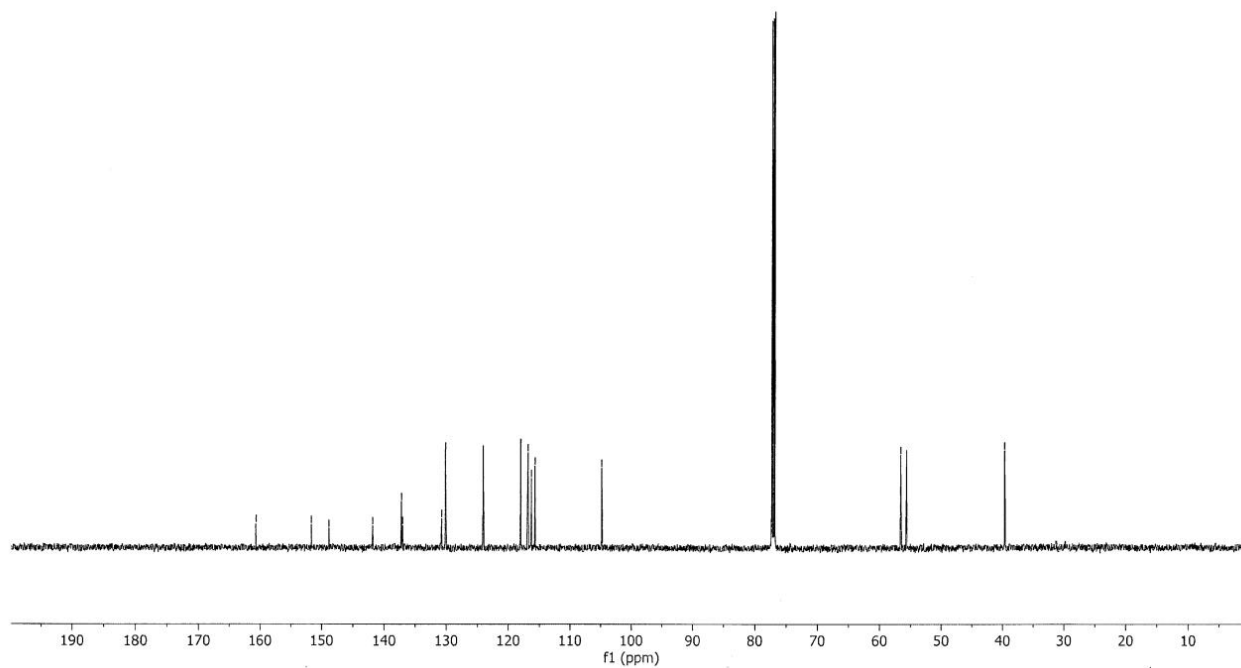

Figure S6. <sup>13</sup>C NMR spectrum of compound 3.

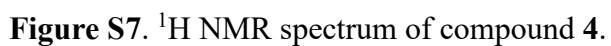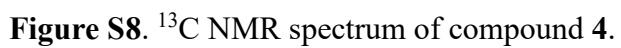

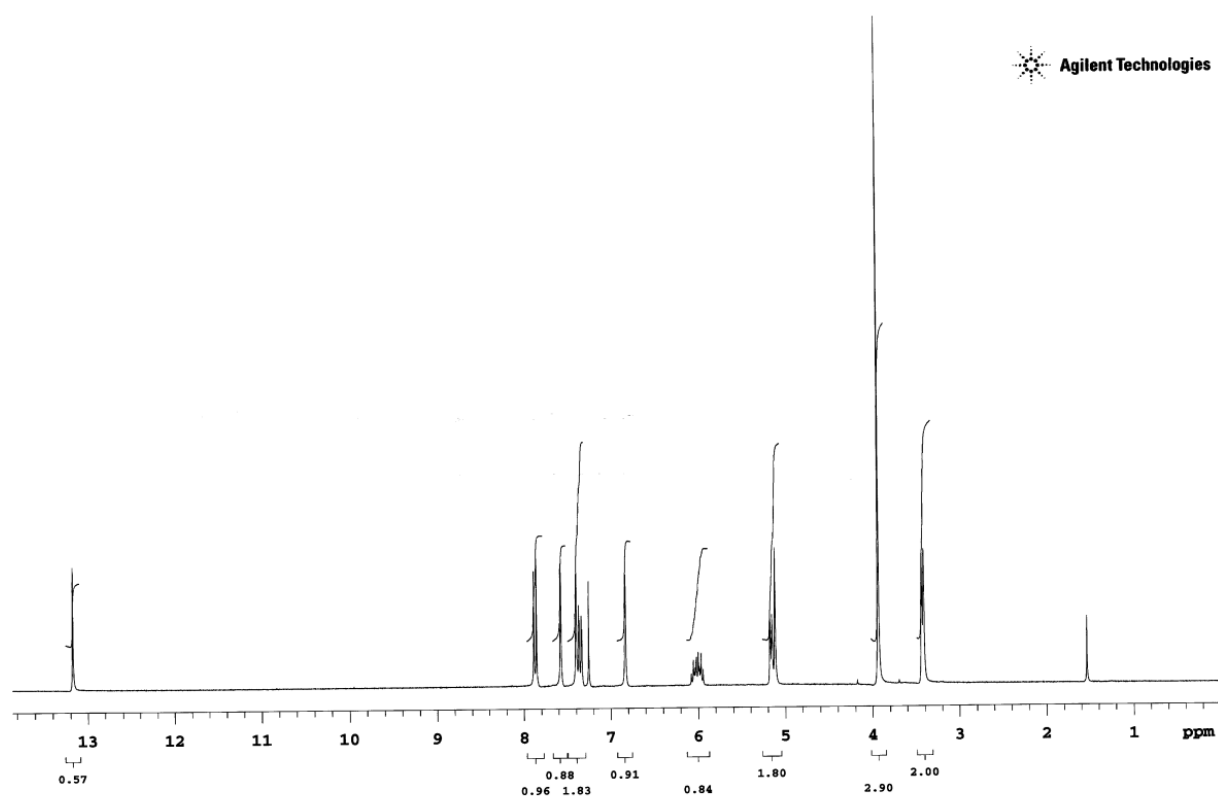

**Figure S9.**  $^1\text{H}$  NMR spectrum of compound **5**.

Gradient Shimming

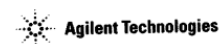

Sample Name:  
E13  
Data Collected on:  
m300-mercury300  
Archive directory:  
/export/home/chempack/vnmrsys/data  
Sample directory:  
FidFile: CARBON  
Pulse Sequence: CARBON (a2pul)  
Solvent: cdcl3  
Data collected on: Oct 25 2023  
Operator: carrador  
Relax. delay 1.000 sec  
Pulse 45.0 degrees  
Acq. time 0.568 sec  
Width 18867.9 Hz  
1961 repetitions  
OBSERVE C13, 75.4847602 MHz  
DECOUPLE H1, 300.1991980 MHz  
Power 38 dB  
continuously on  
WALTZ-16 modulated  
DATA PROCESSING  
Line broadening 0.5 Hz  
FT size 32768  
Total time 1 hr, 43 min

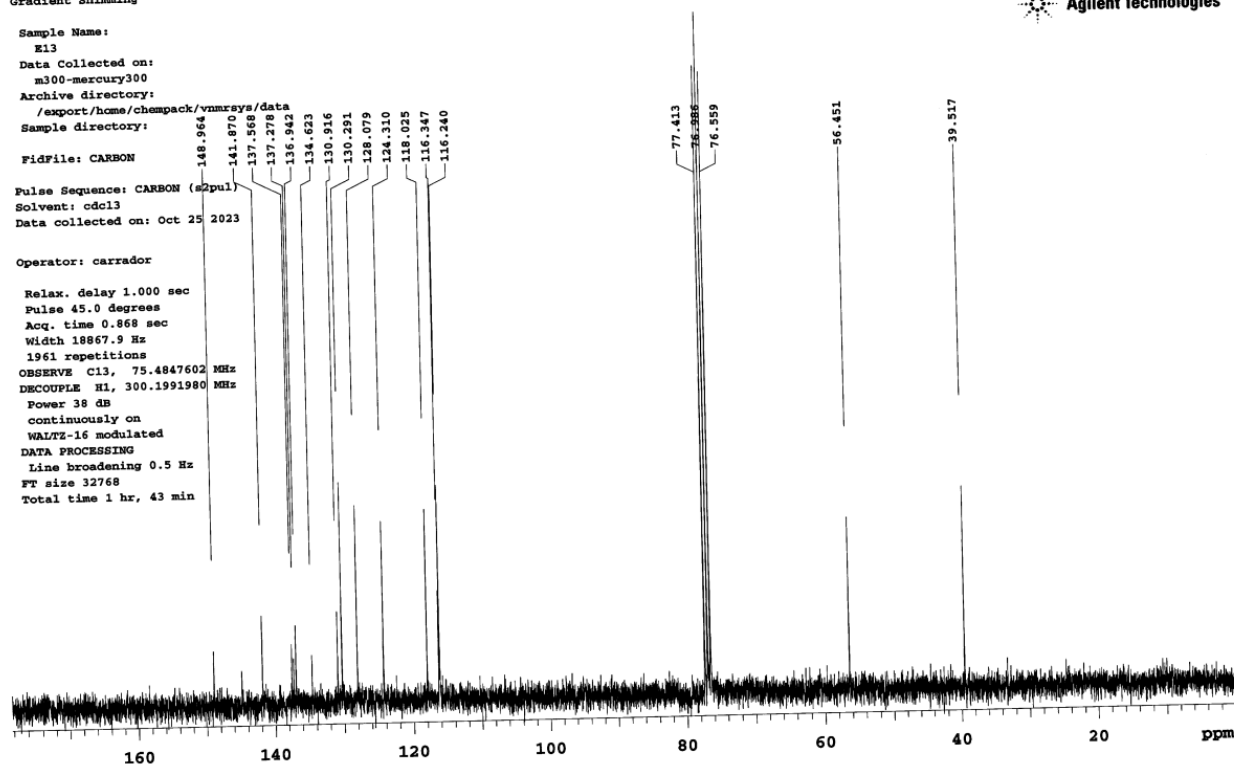

Figure S10.  $^{13}\text{C}$  NMR spectrum of compound 5.

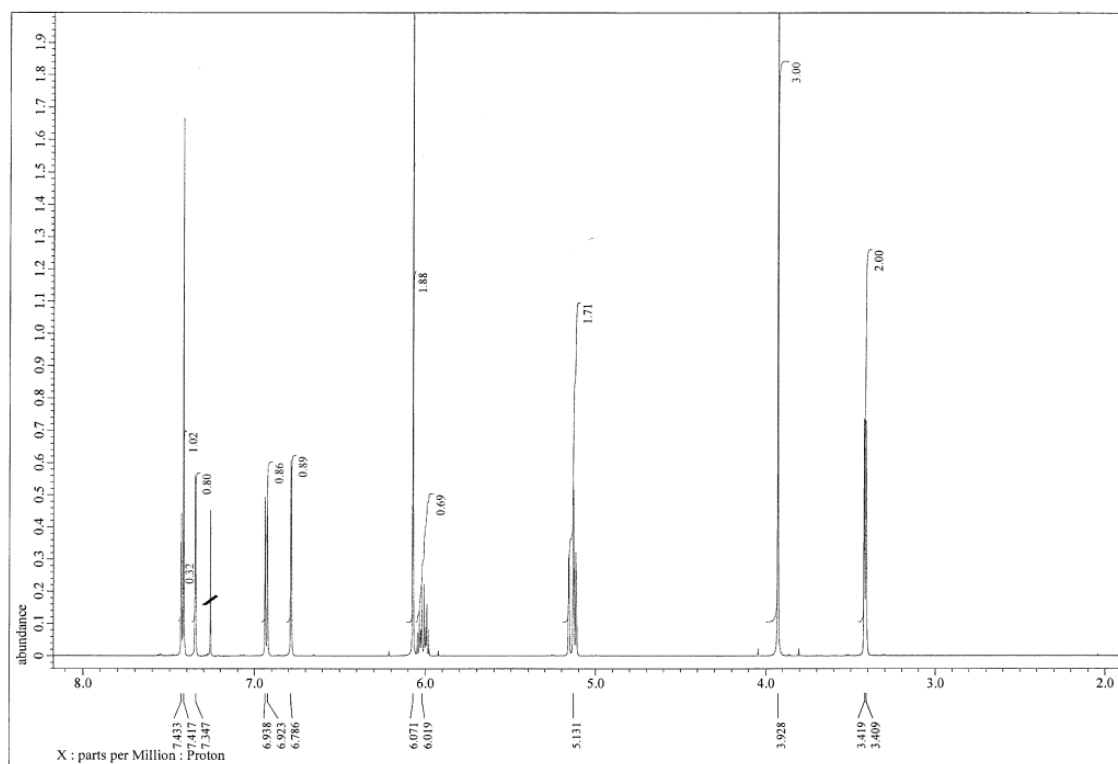

Figure S11.  $^1\text{H}$  NMR spectrum of compound 6.

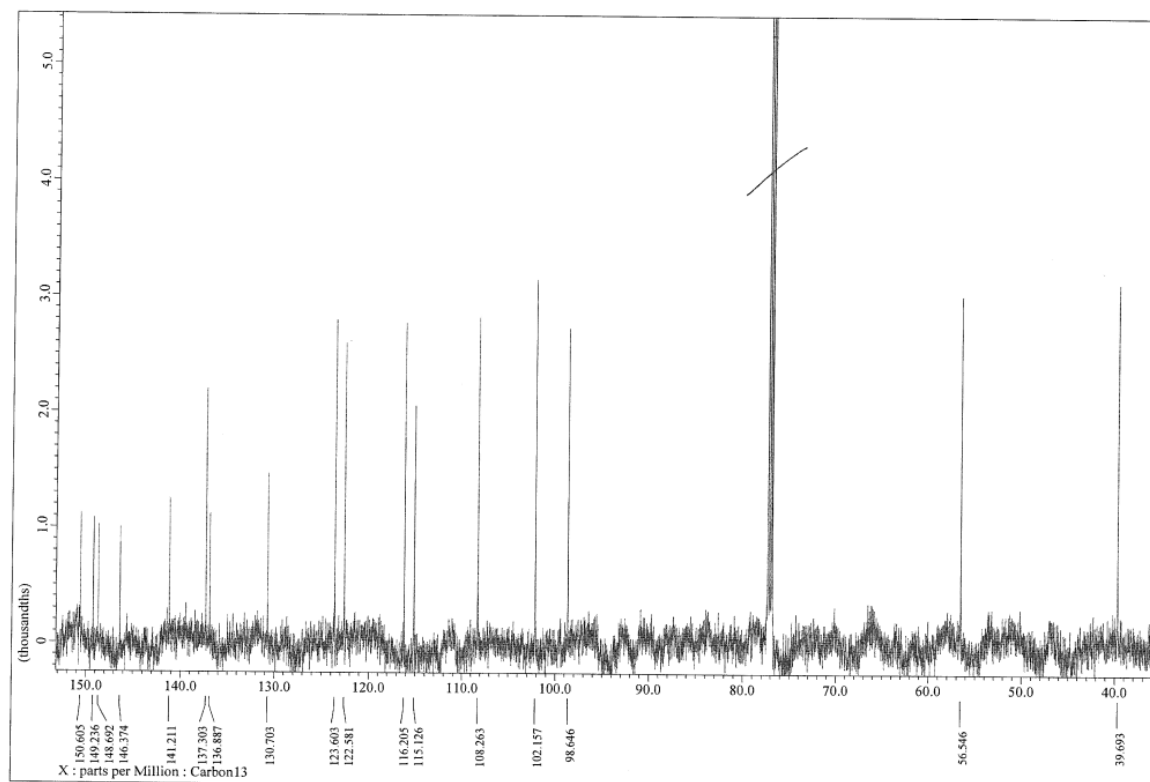

Figure S12. <sup>13</sup>C NMR spectrum of compound 6.

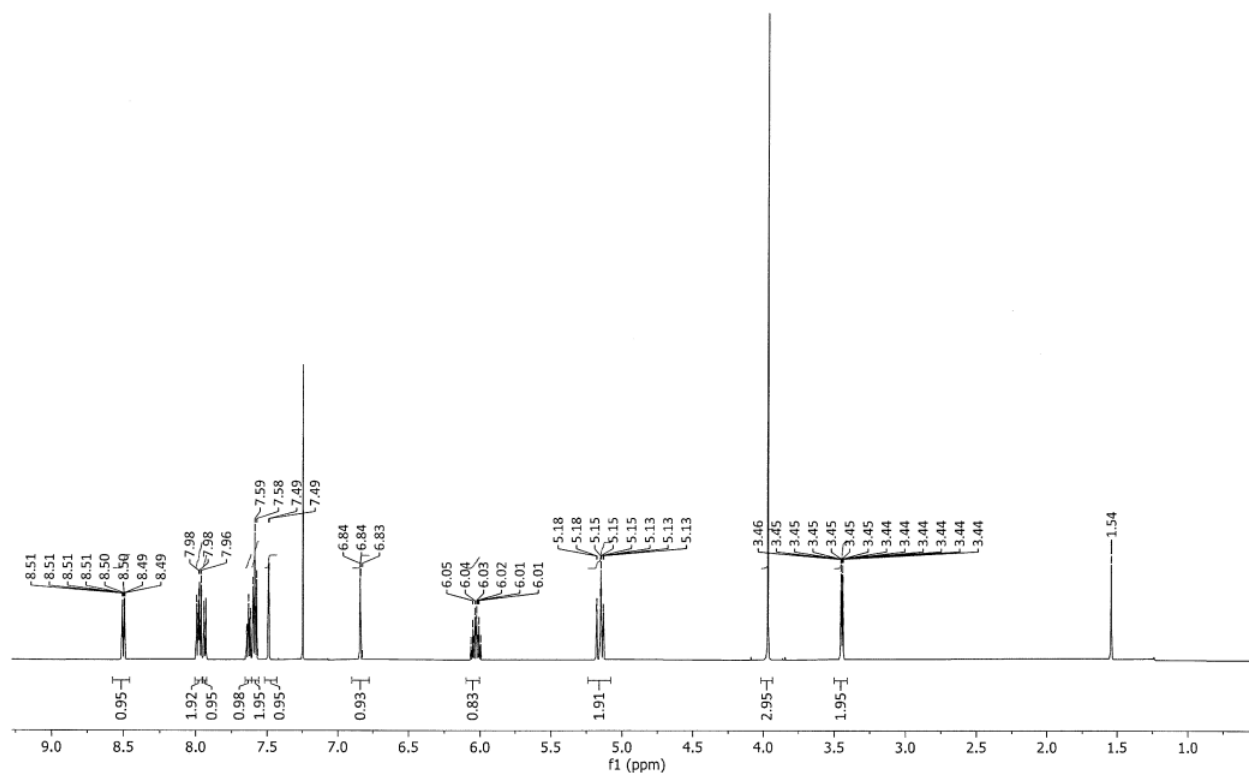

Figure S13. <sup>1</sup>H NMR spectrum of compound 7.



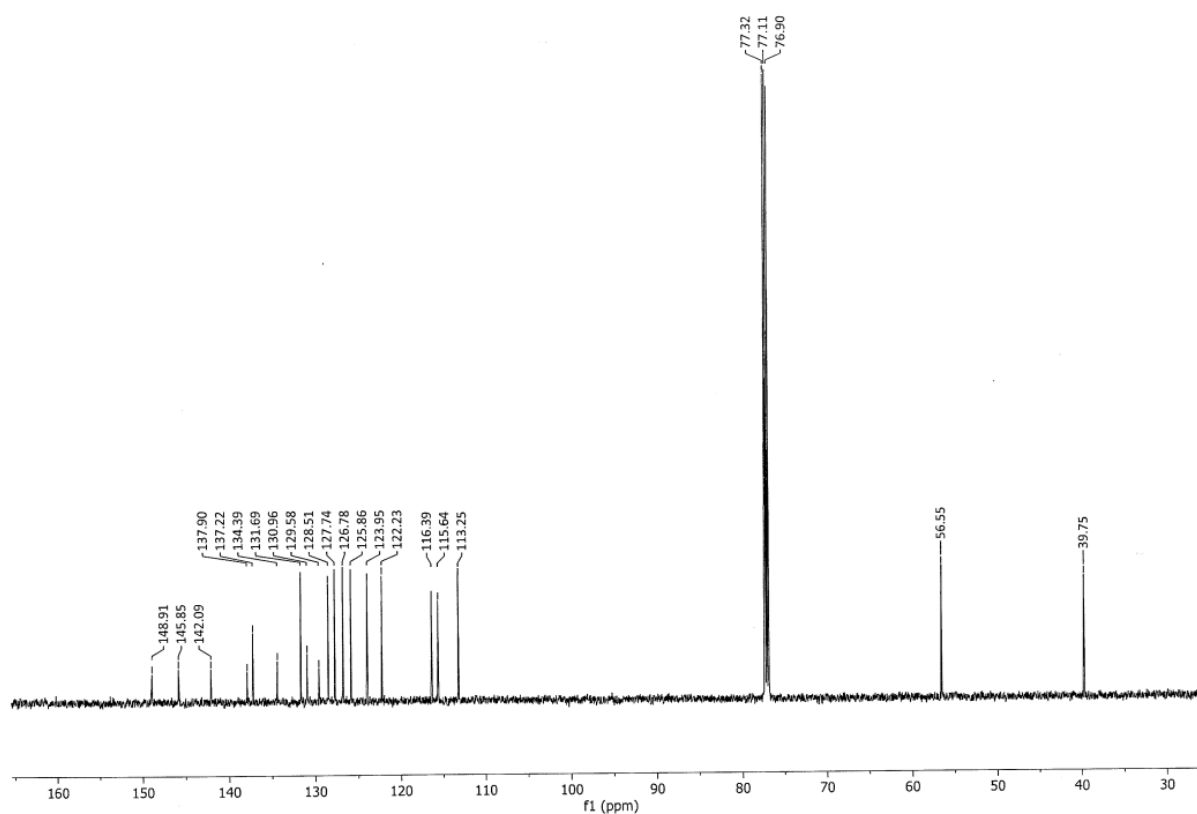

**Figure S14.** <sup>13</sup>C NMR spectrum of compound 7.

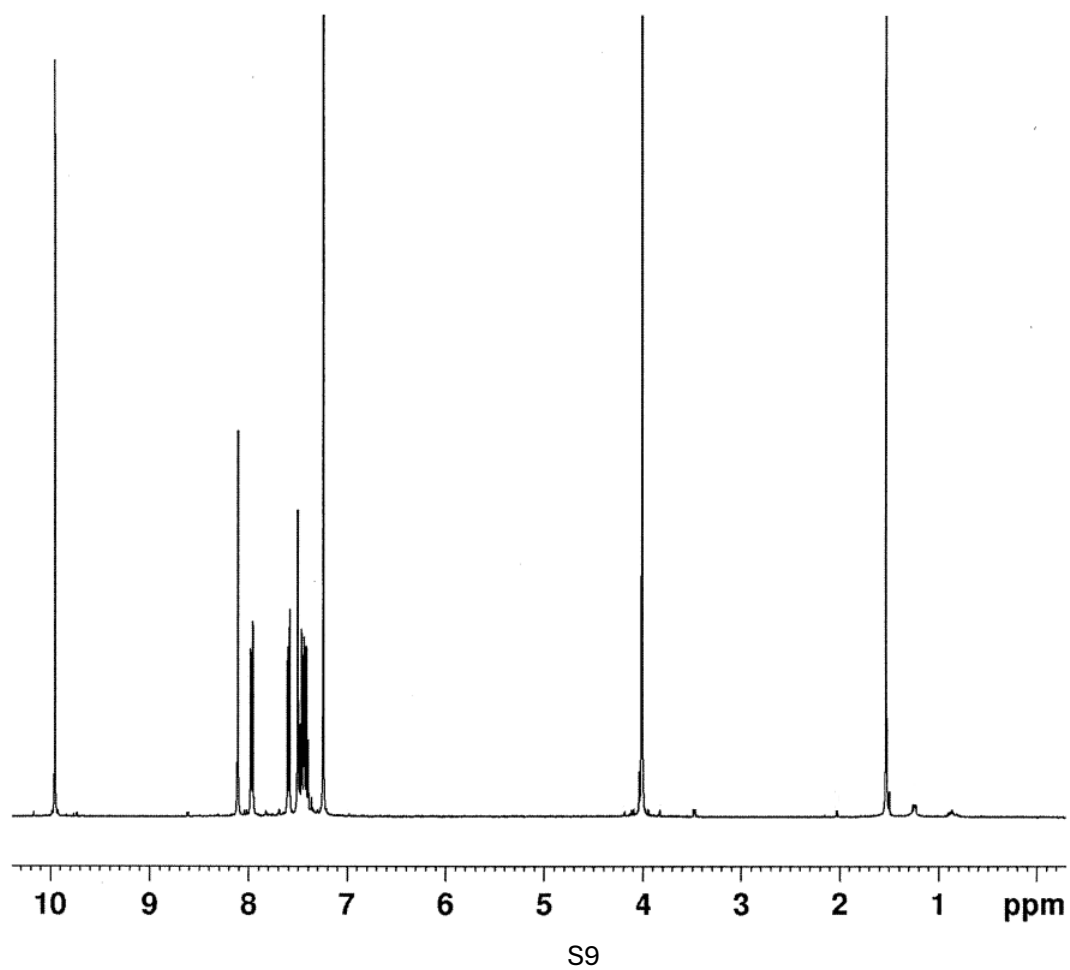

Figure S15.  $^1\text{H}$  NMR spectrum of compound 8.

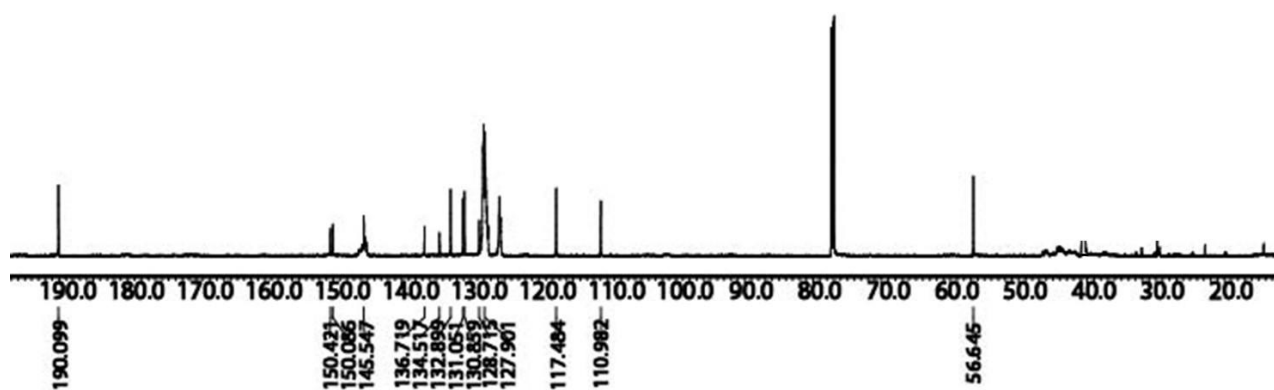

Figure S16.  $^{13}\text{C}$  NMR spectrum of compound 8.

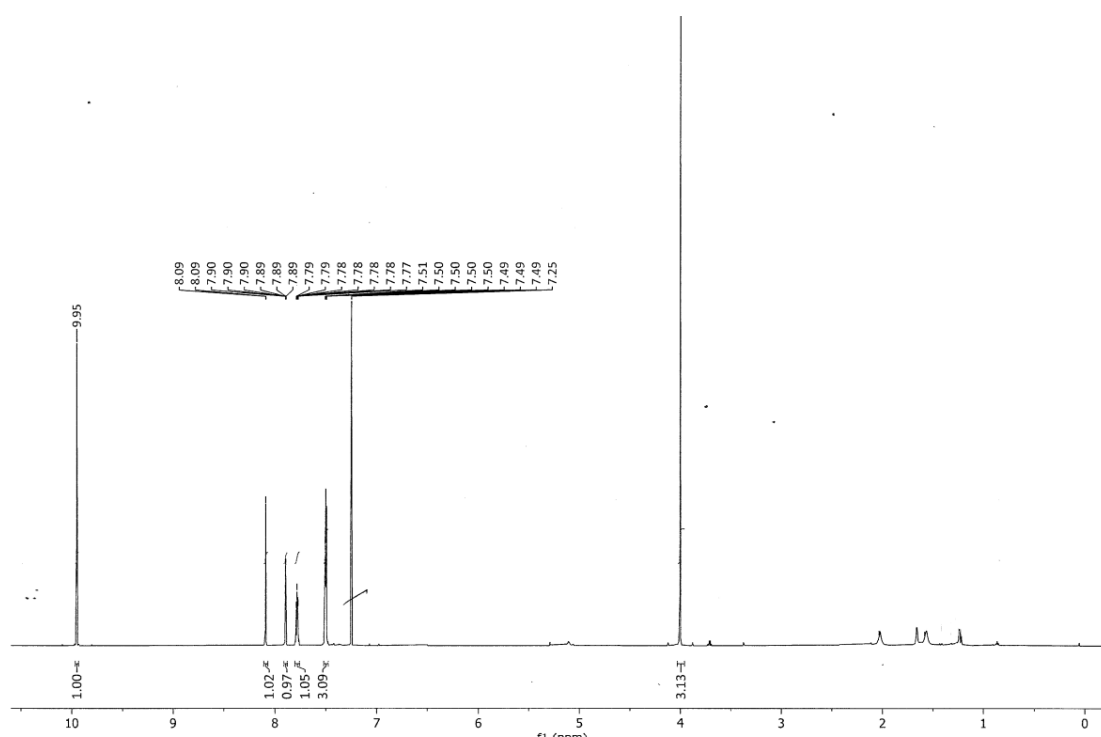

Figure S17.  $^1\text{H}$  NMR spectrum of compound 9.

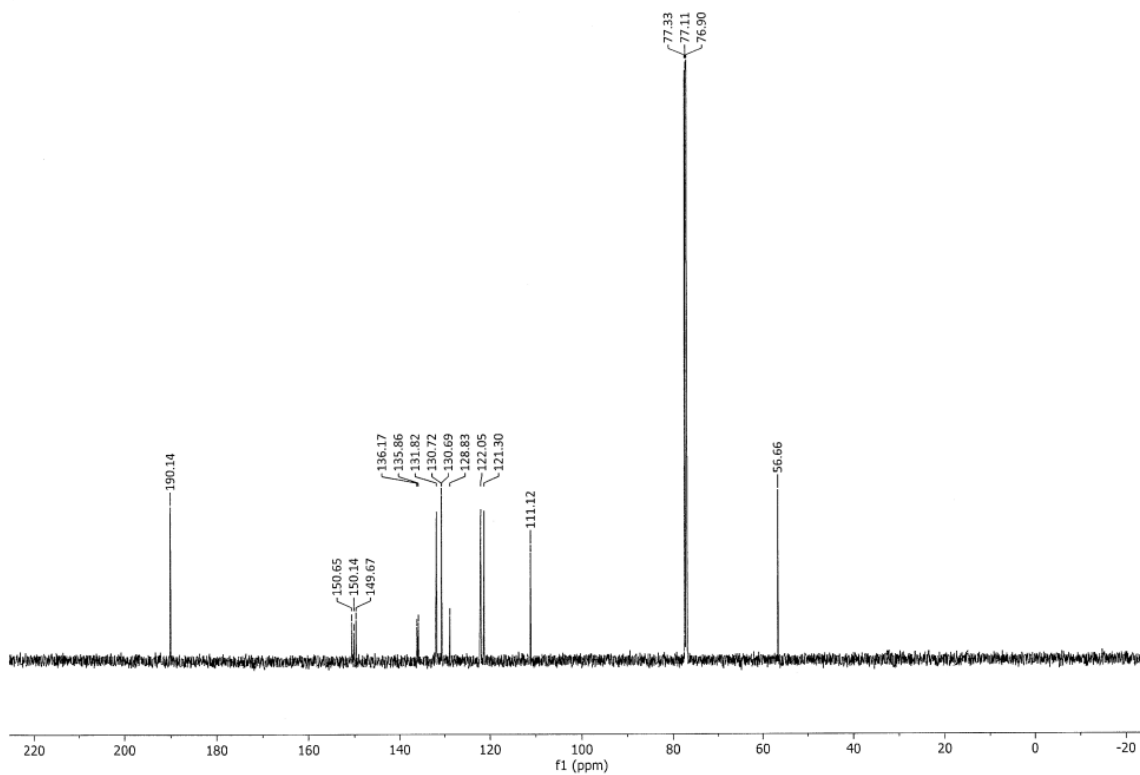

Figure S18. <sup>13</sup>C NMR spectrum of compound 9.

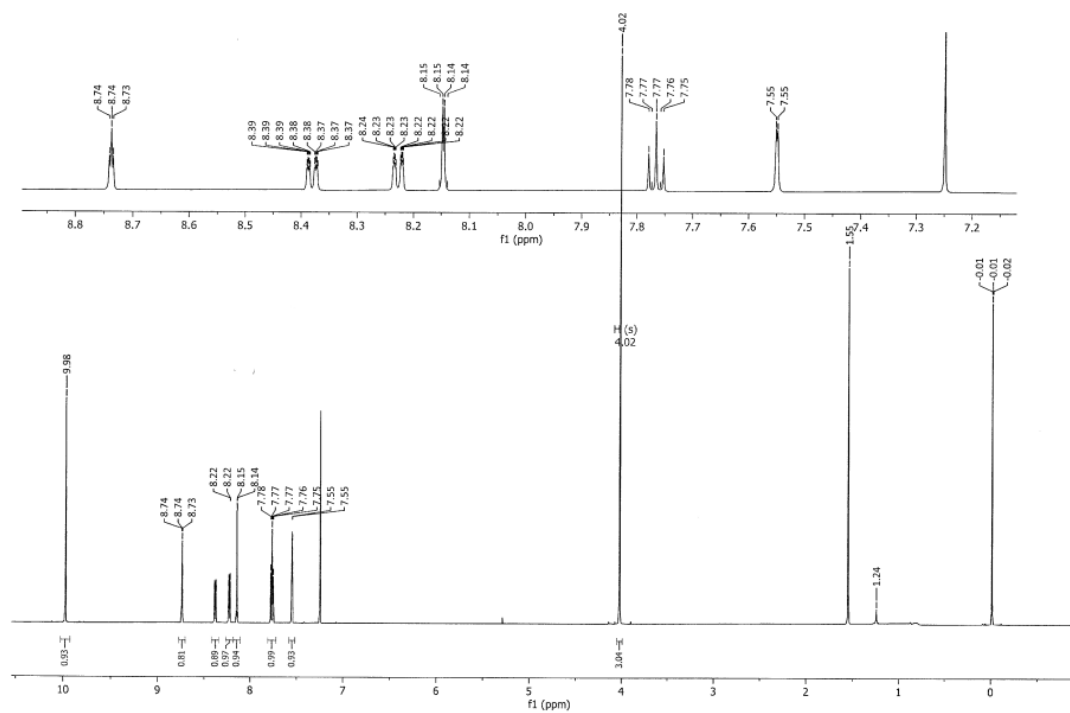

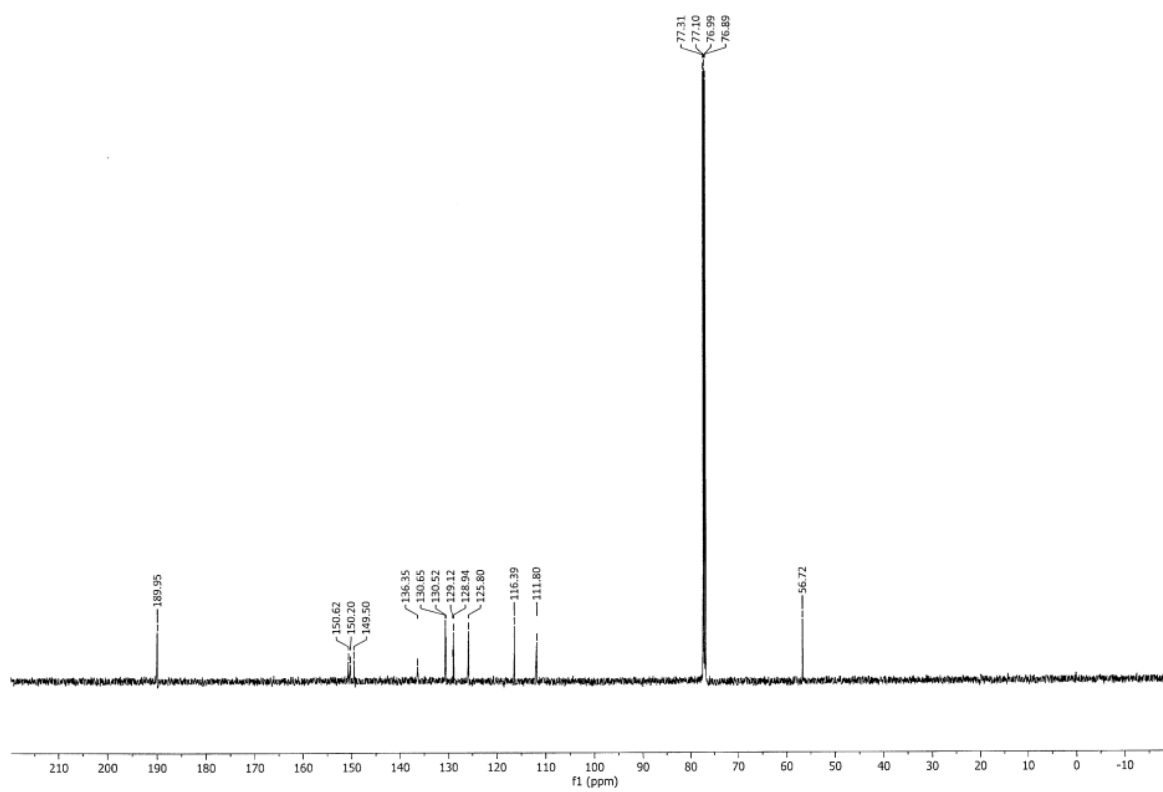

Figure S20. <sup>13</sup>C NMR spectrum of compound 10.

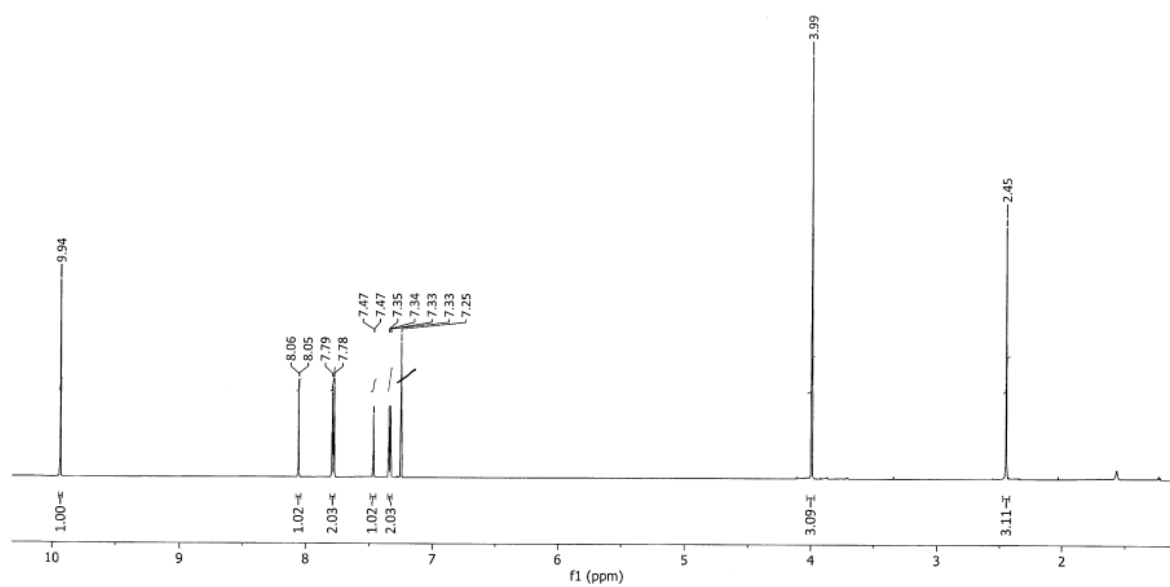

Figure S21. <sup>1</sup>H NMR spectrum of compound 11.

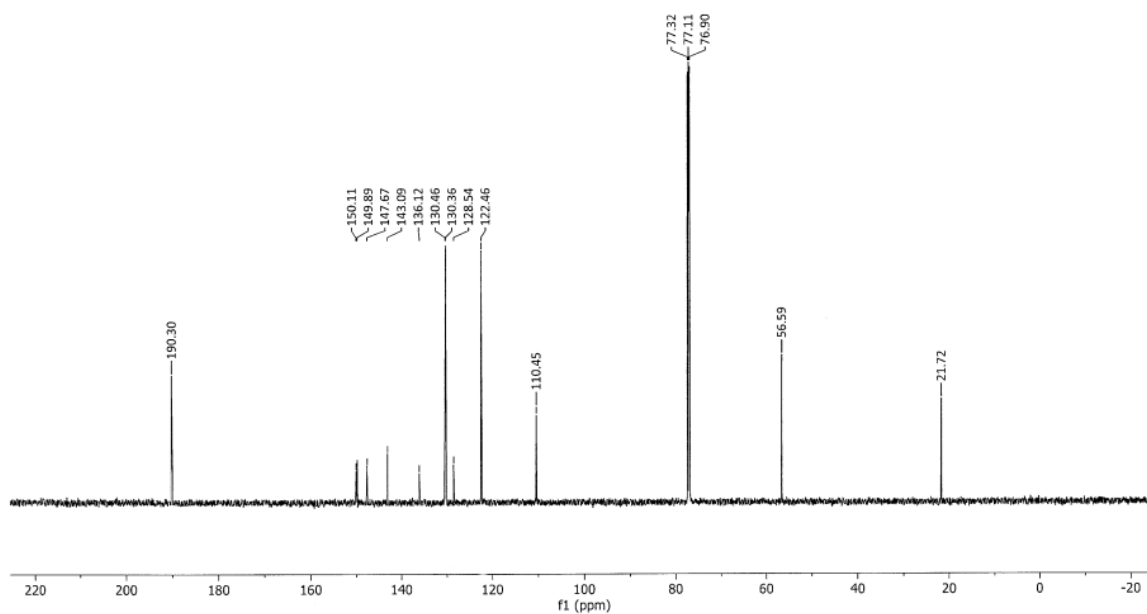

**Figure S22.**  $^{13}\text{C}$  NMR spectrum of compound 11.

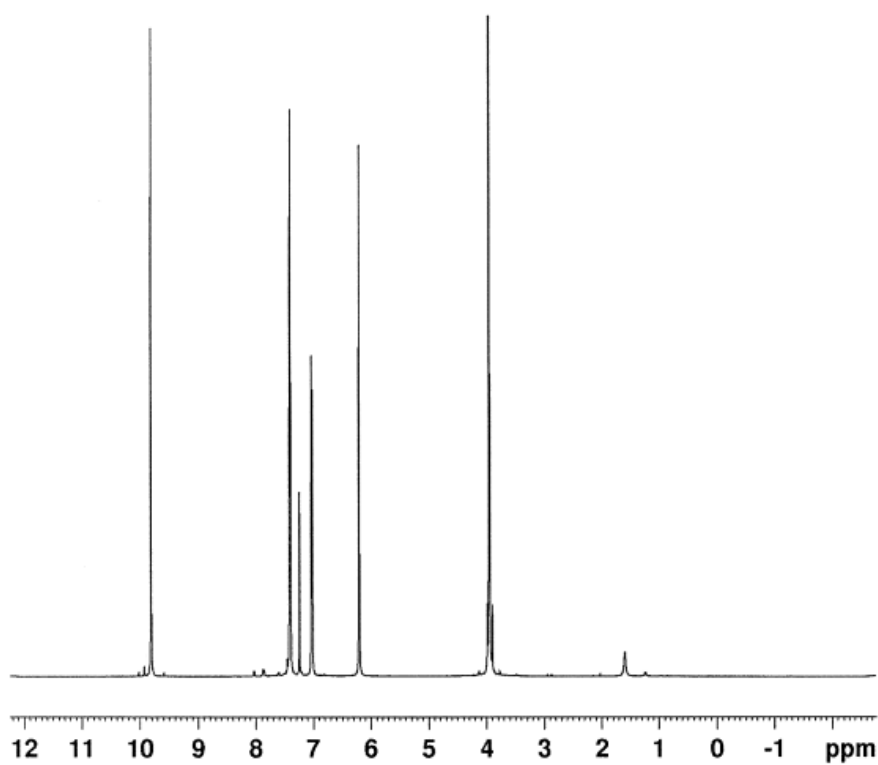

**Figure S23.**  $^1\text{H}$  NMR spectrum of compound **12**.

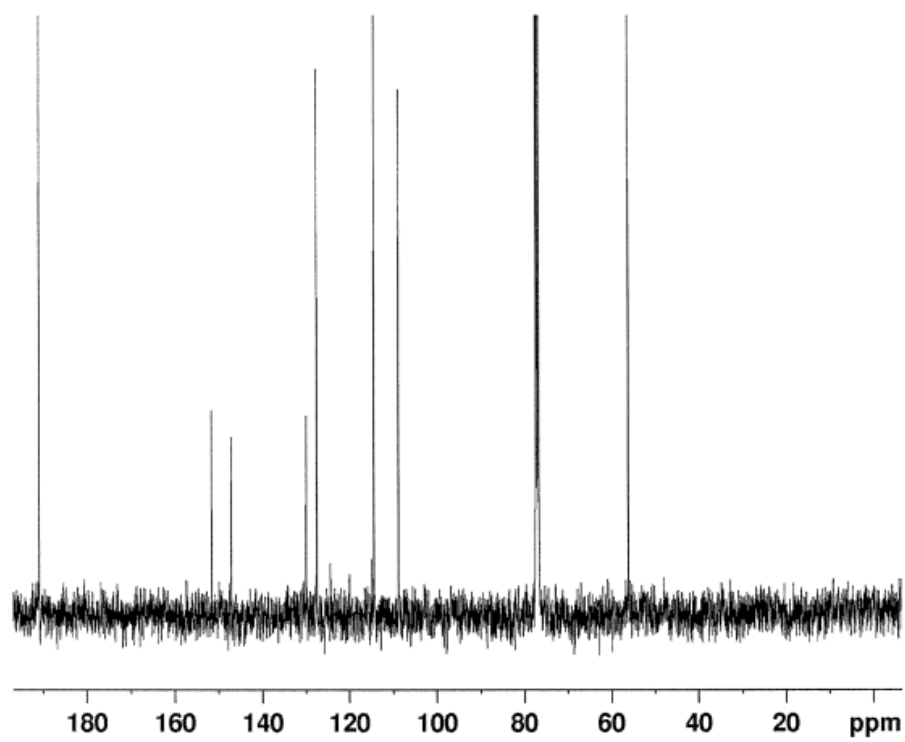

**Figure S24.**  $^{13}\text{C}$  NMR spectrum of compound **12**.

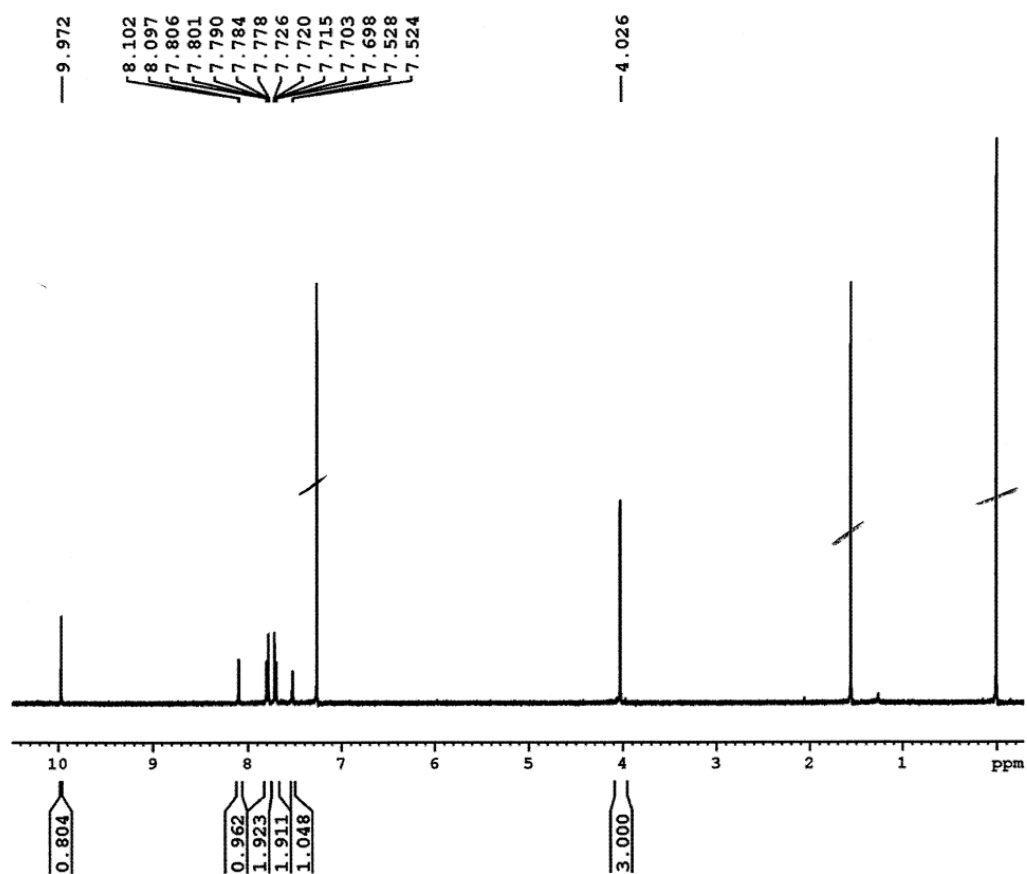

Figure S25.  $^1\text{H}$  NMR spectrum of compound 13.

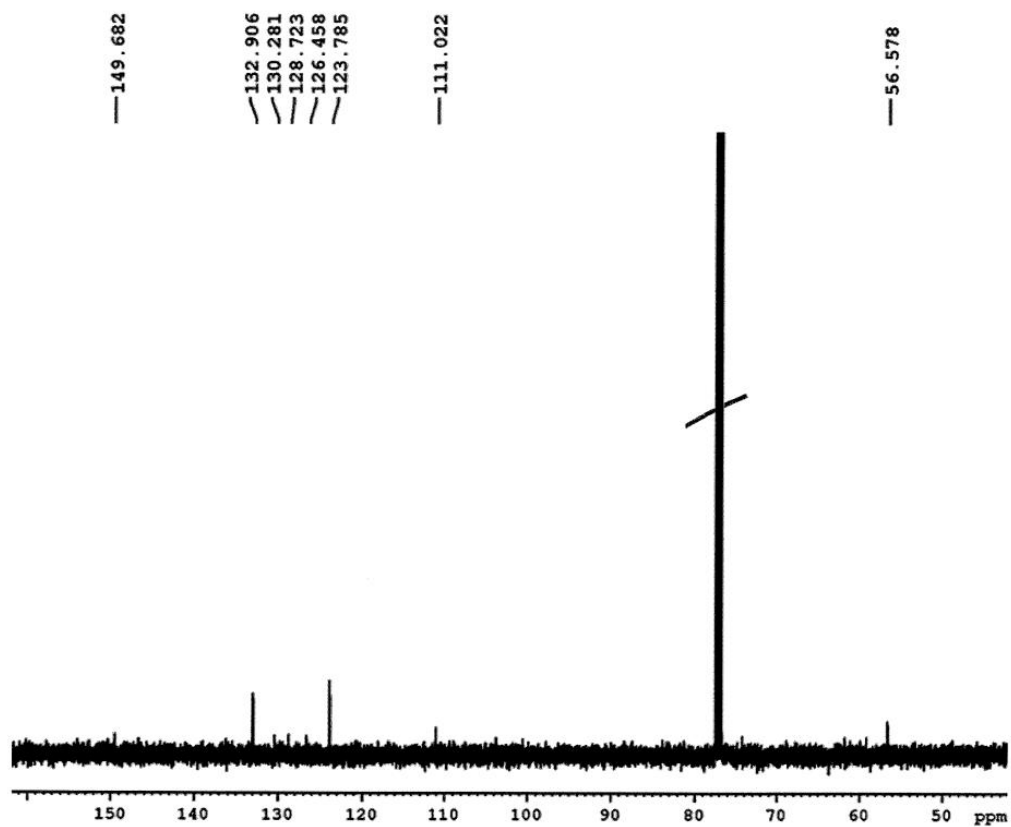

Figure S26.  $^{13}\text{C}$  NMR spectrum of compound 13.

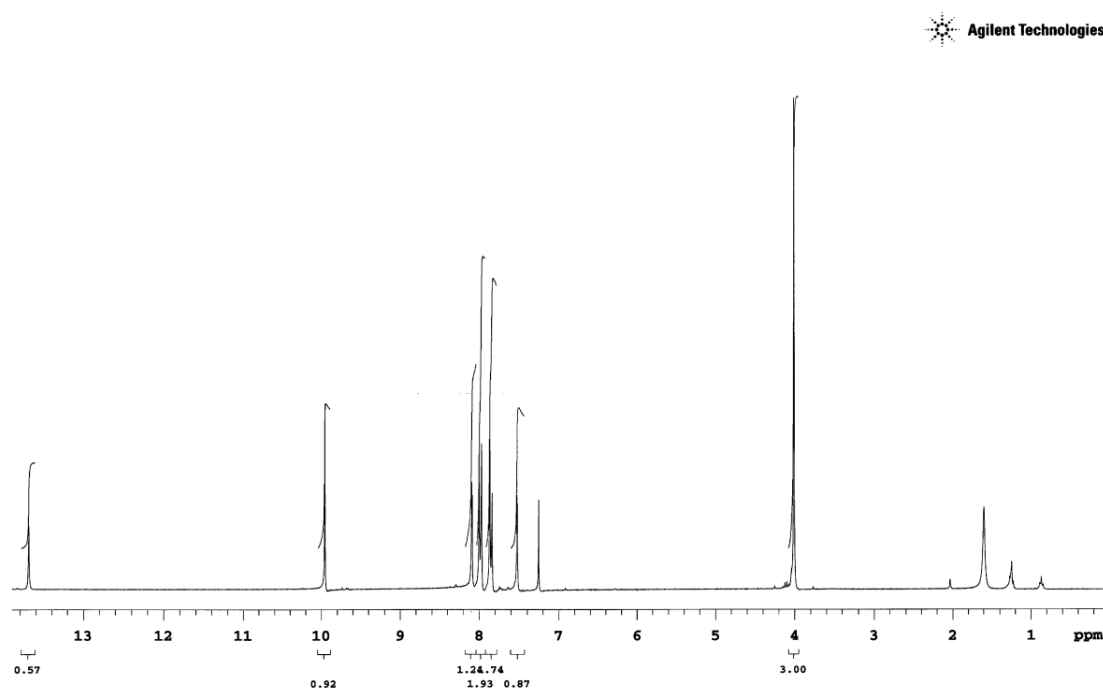

Figure S27.  $^1\text{H}$  NMR spectrum of compound 14.

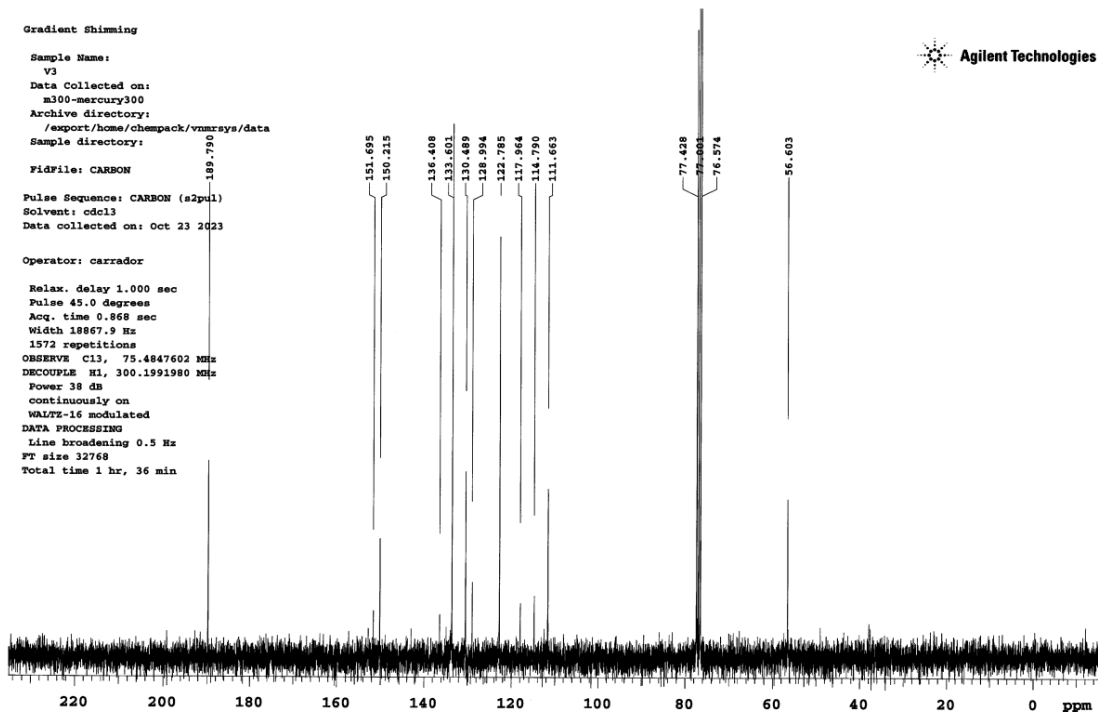

Figure S28.  $^{13}\text{C}$  NMR spectrum of compound 14.



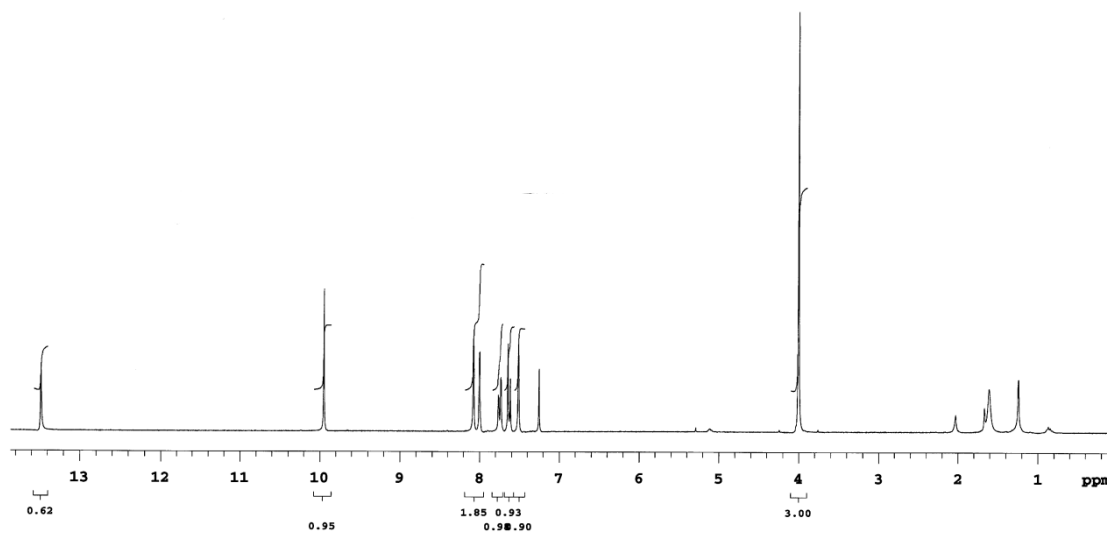

Figure S29.  $^1\text{H}$  NMR spectrum of compound 15.

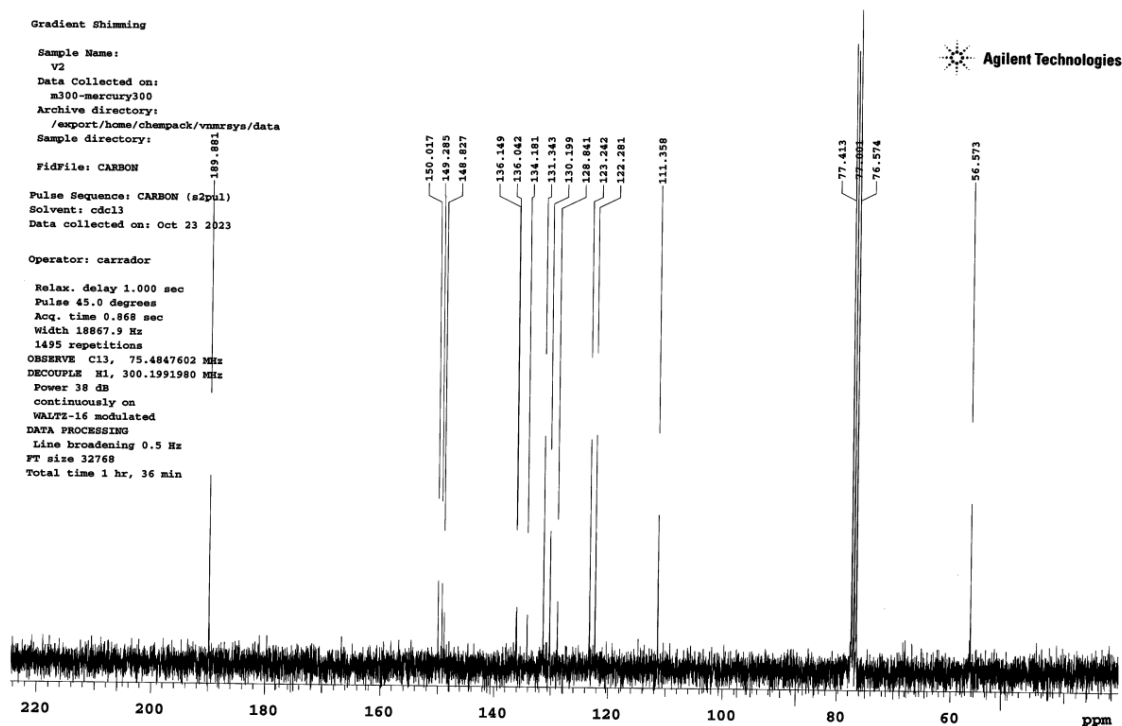

Figure S30.  $^{13}\text{C}$  NMR spectrum of compound 15.

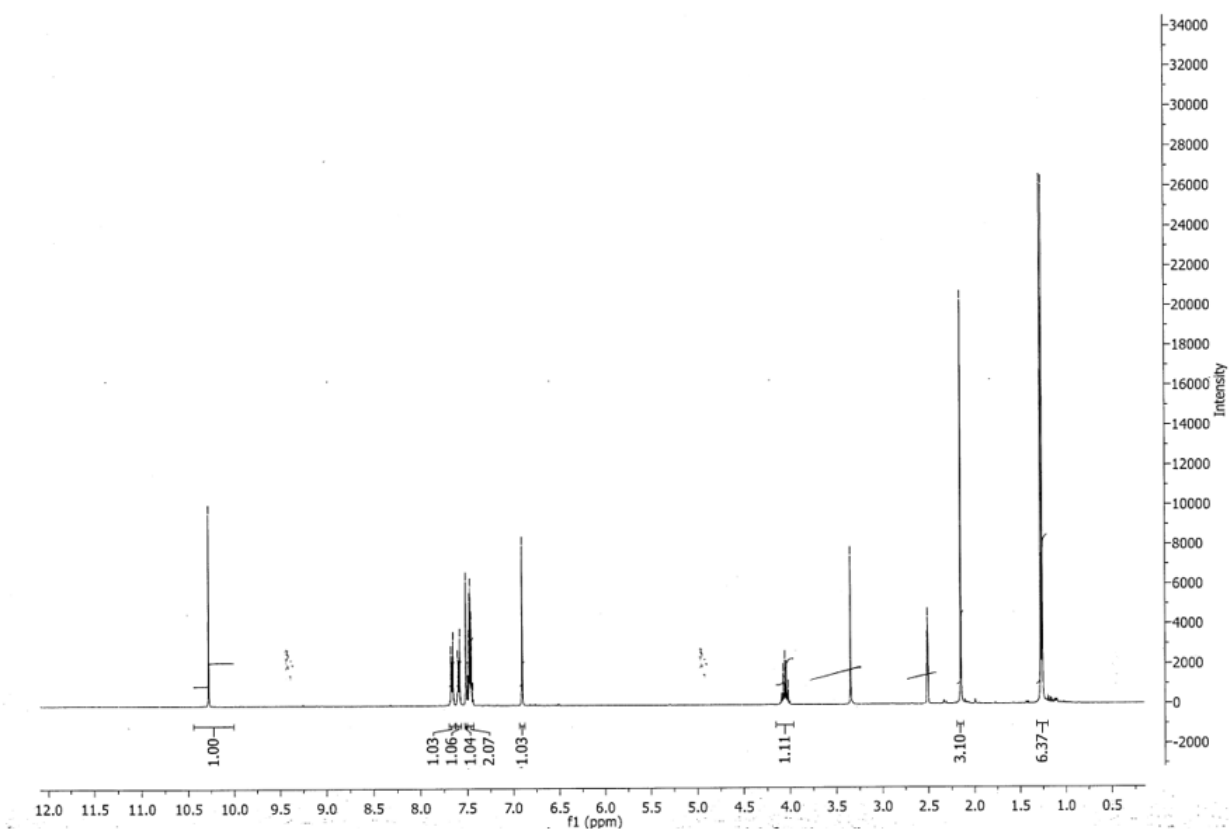

Figure S31. <sup>1</sup>H NMR spectrum of compound 16.

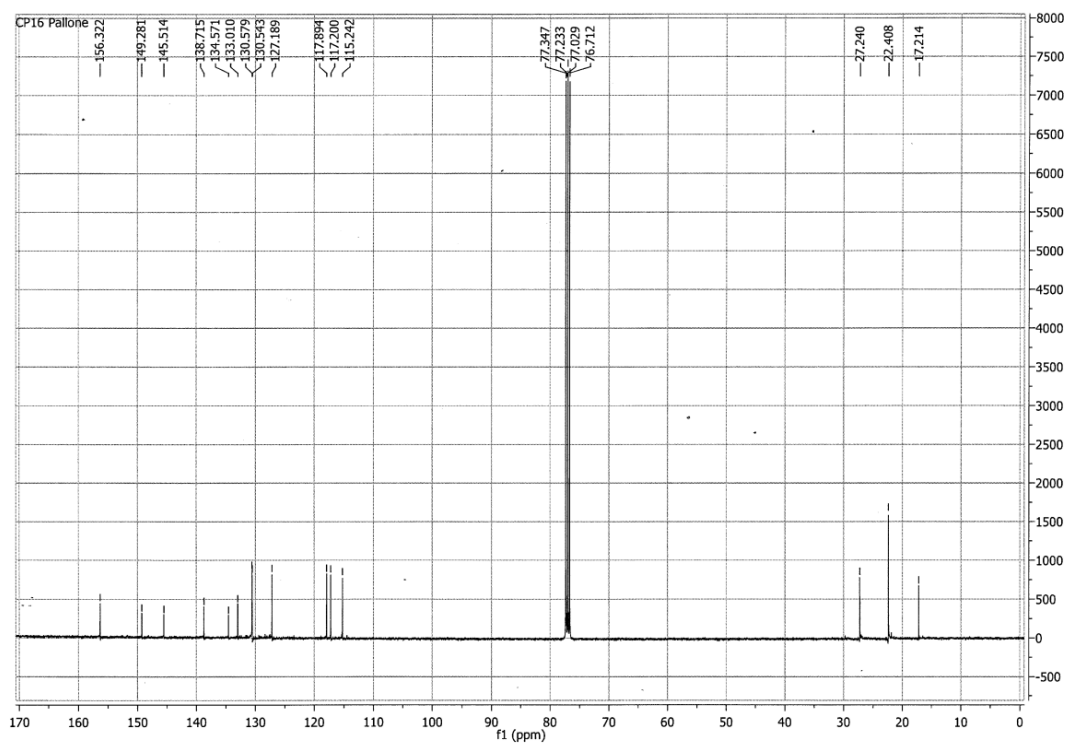

Figure S32. <sup>13</sup>C NMR spectrum of compound 16.

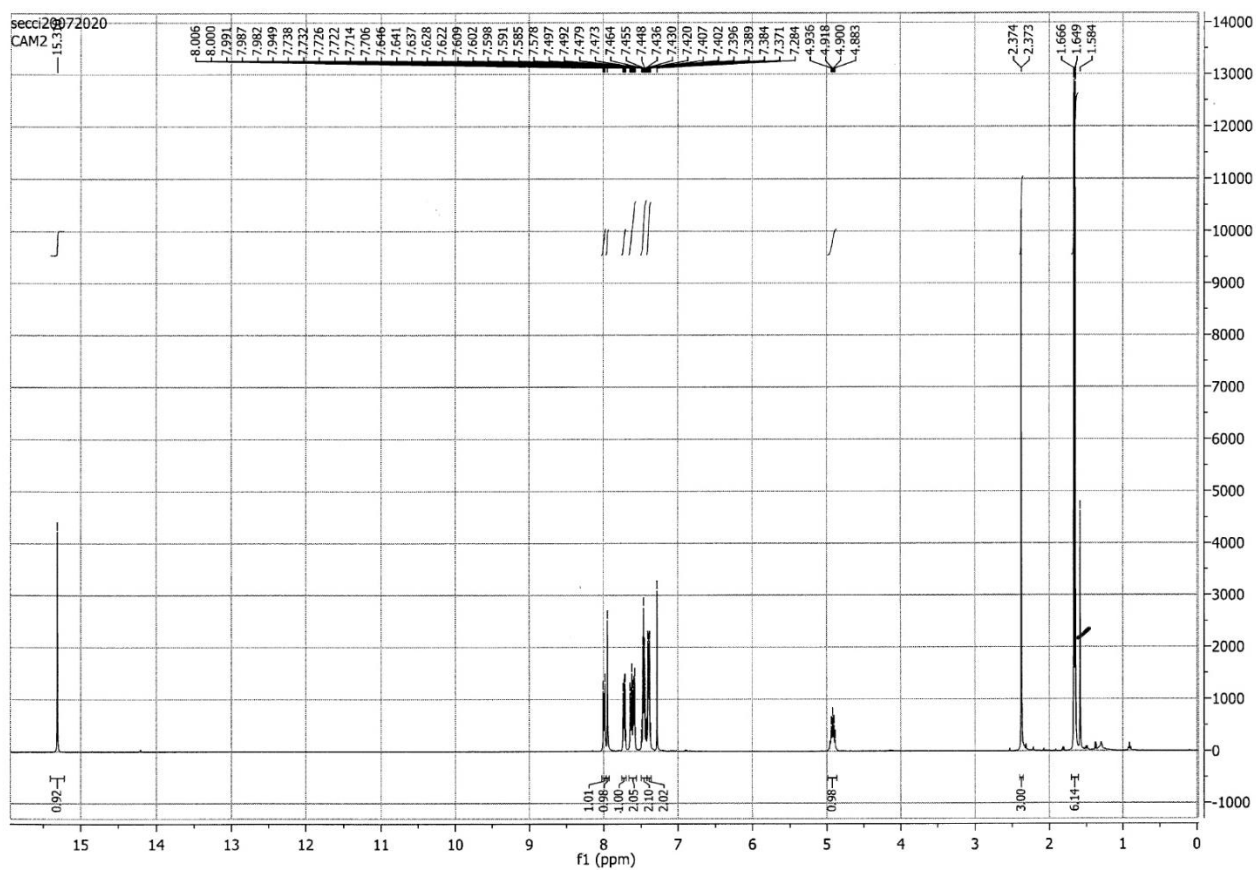

Figure S33.  $^1\text{H}$  NMR spectrum of compound 17.

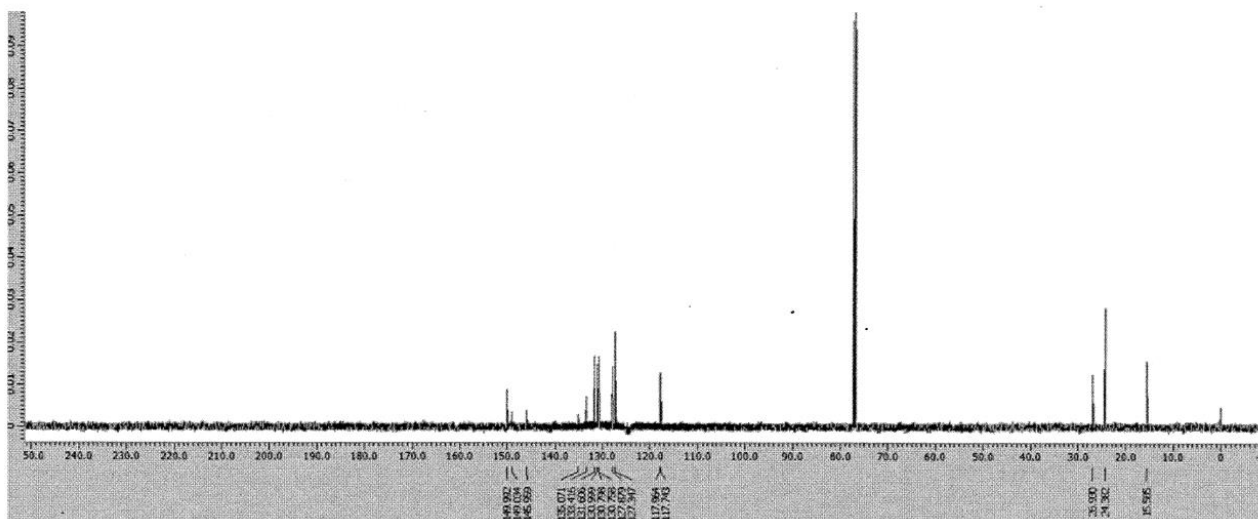

Figure S34.  $^{13}\text{C}$  NMR spectrum of compound 17.

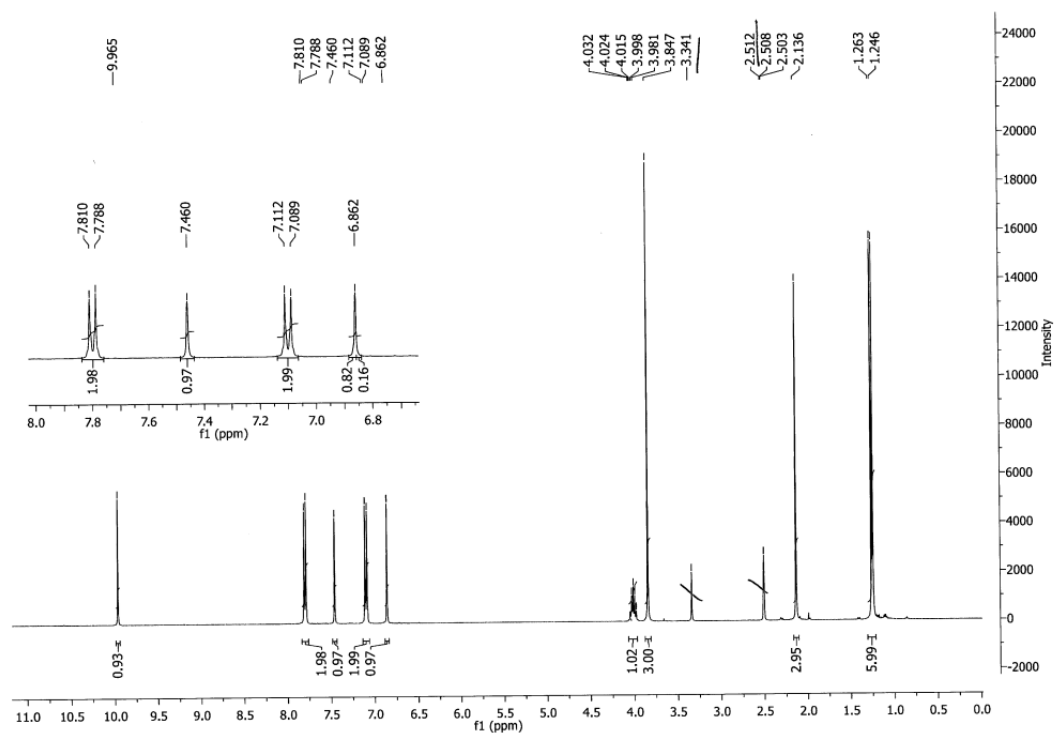

Figure S35. <sup>1</sup>H NMR spectrum of compound **18**.

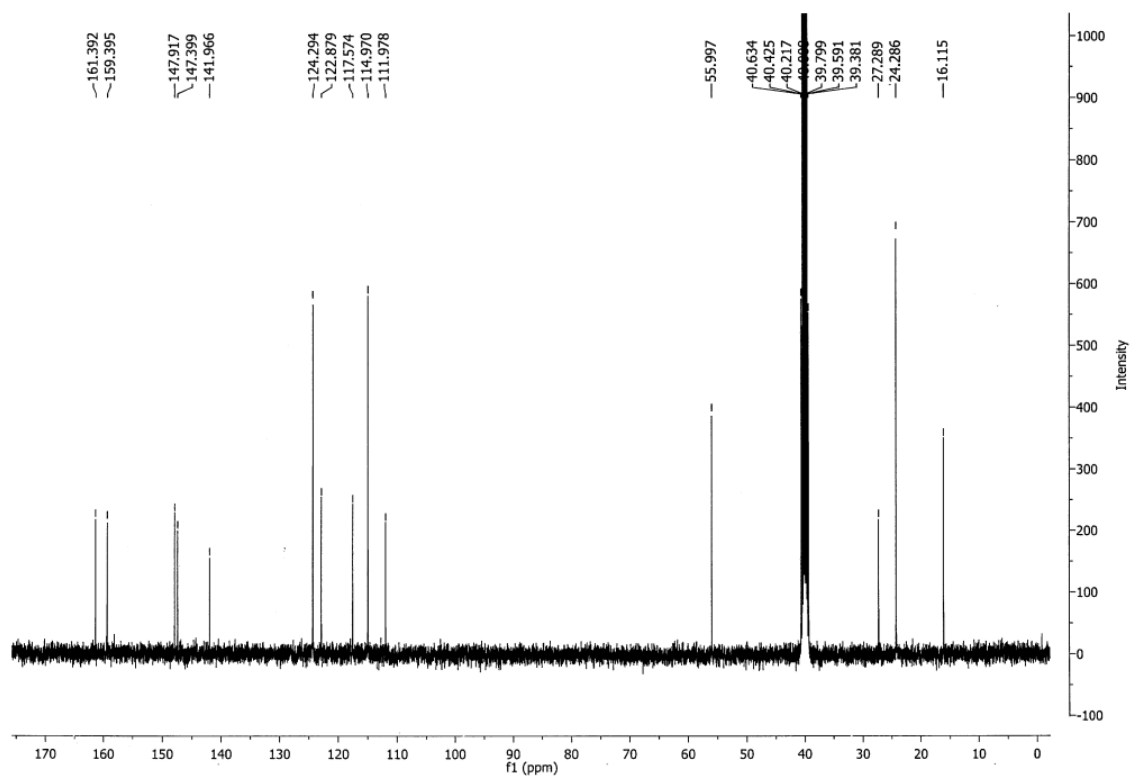

Figure S36. <sup>13</sup>C NMR spectrum of compound **18**.

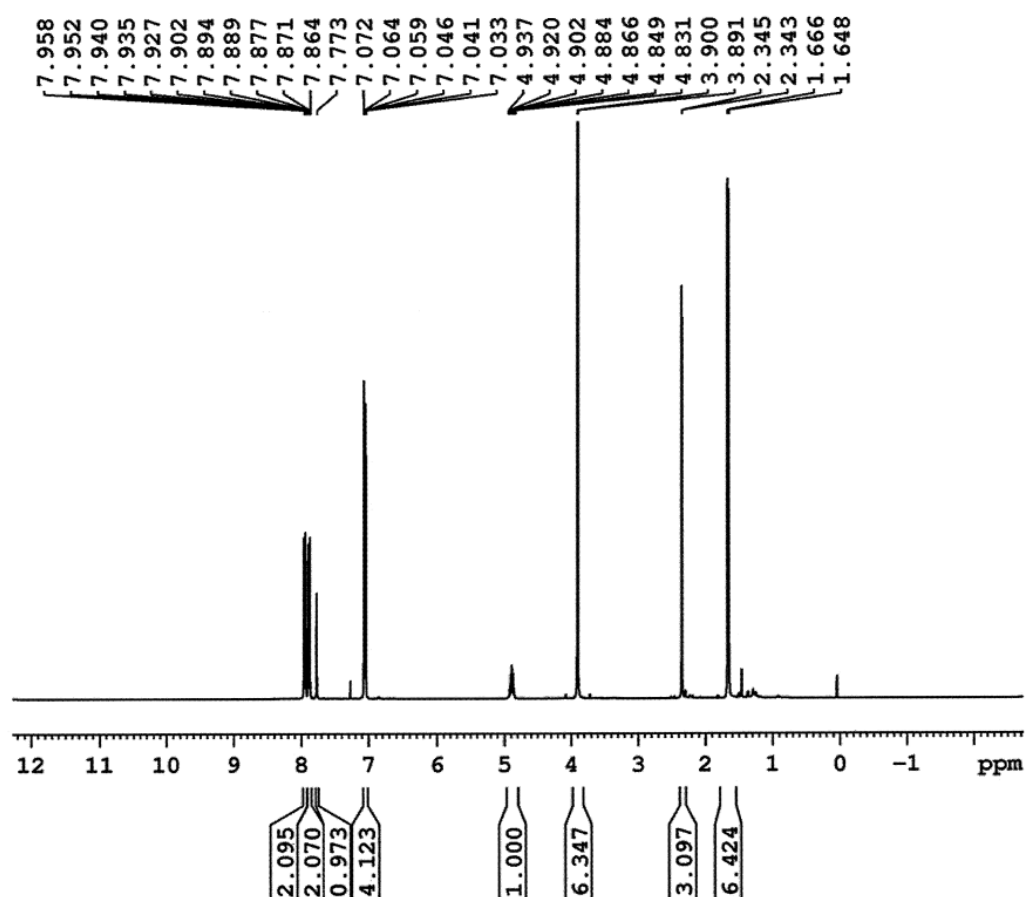

Figure S37. <sup>1</sup>H NMR spectrum of compound 19.

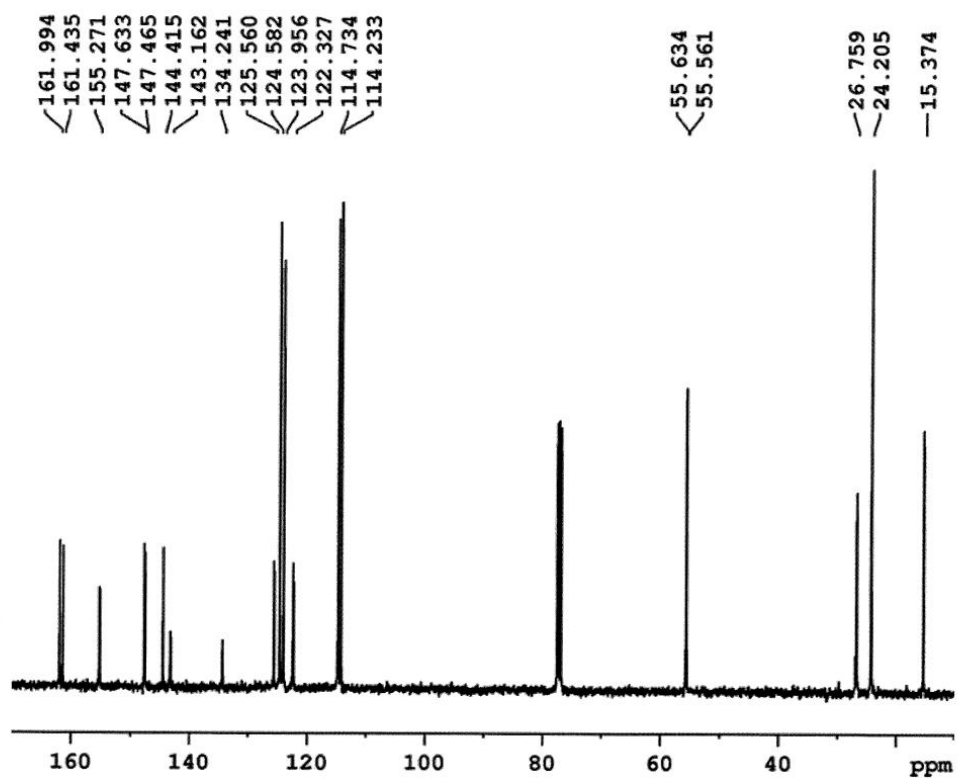

**Figure S38.**  $^{13}\text{C}$  NMR spectrum of compound **19**.

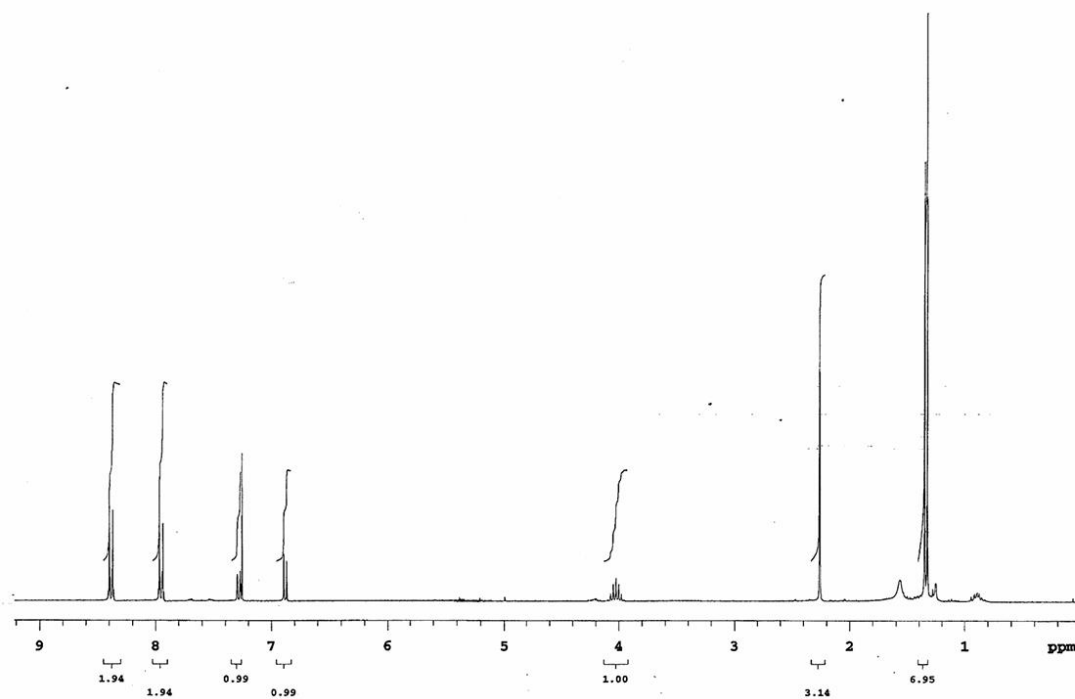

**Figure S39.**  $^1\text{H}$  NMR spectrum of compound **20**.

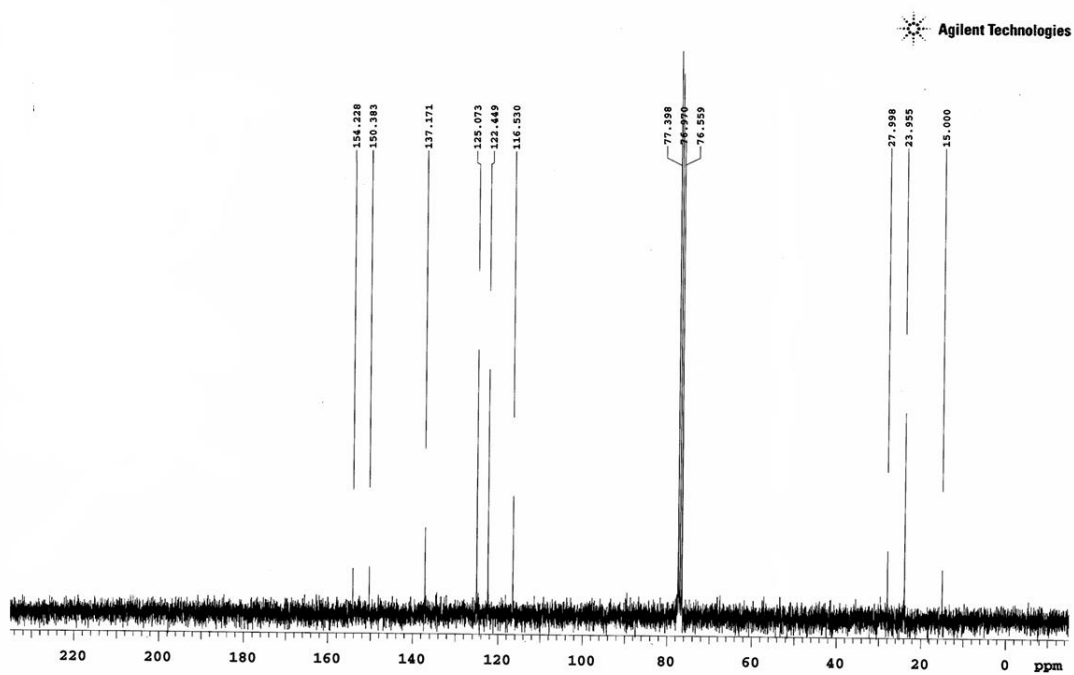

**Figure S40.**  $^{13}\text{C}$  NMR spectrum of compound **20**.

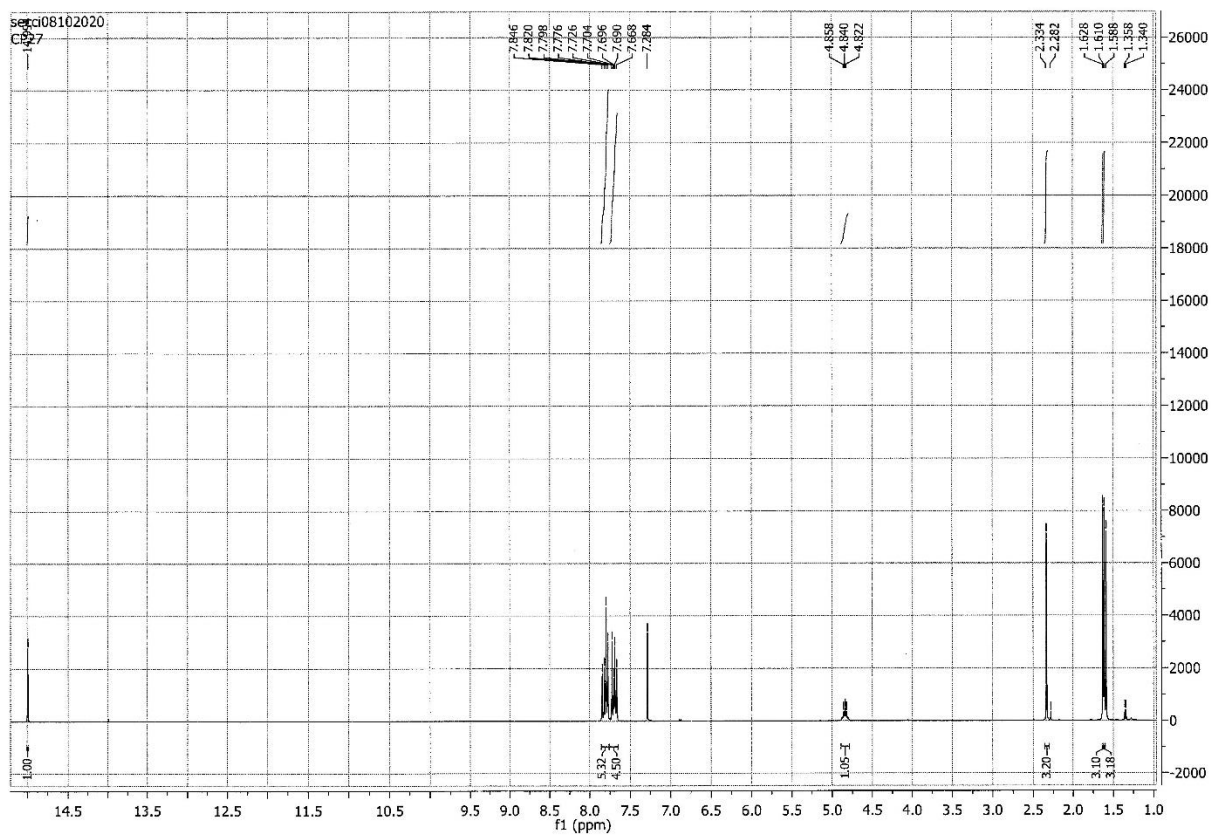

**Figure S41.**  $^1\text{H}$  NMR spectrum of compound **21**.

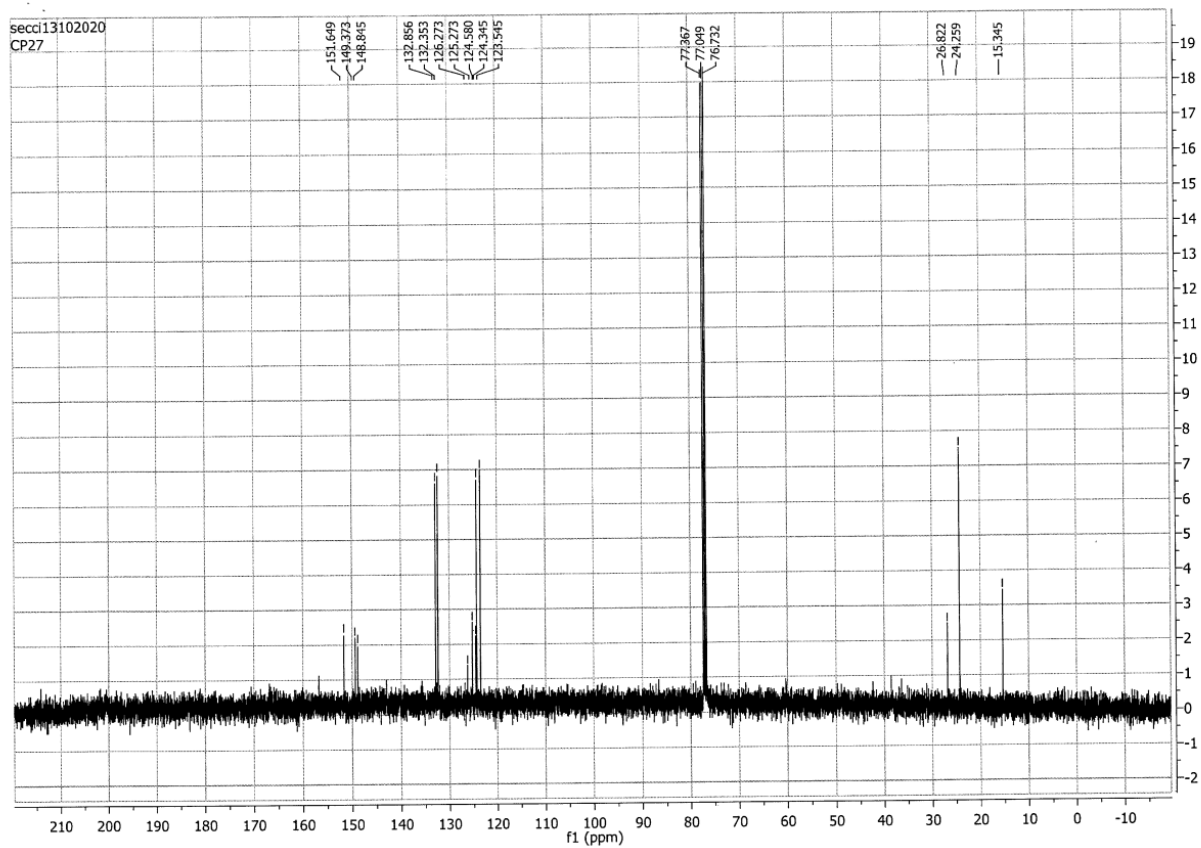

Figure S42.  $^{13}\text{C}$  NMR spectrum of compound 21.

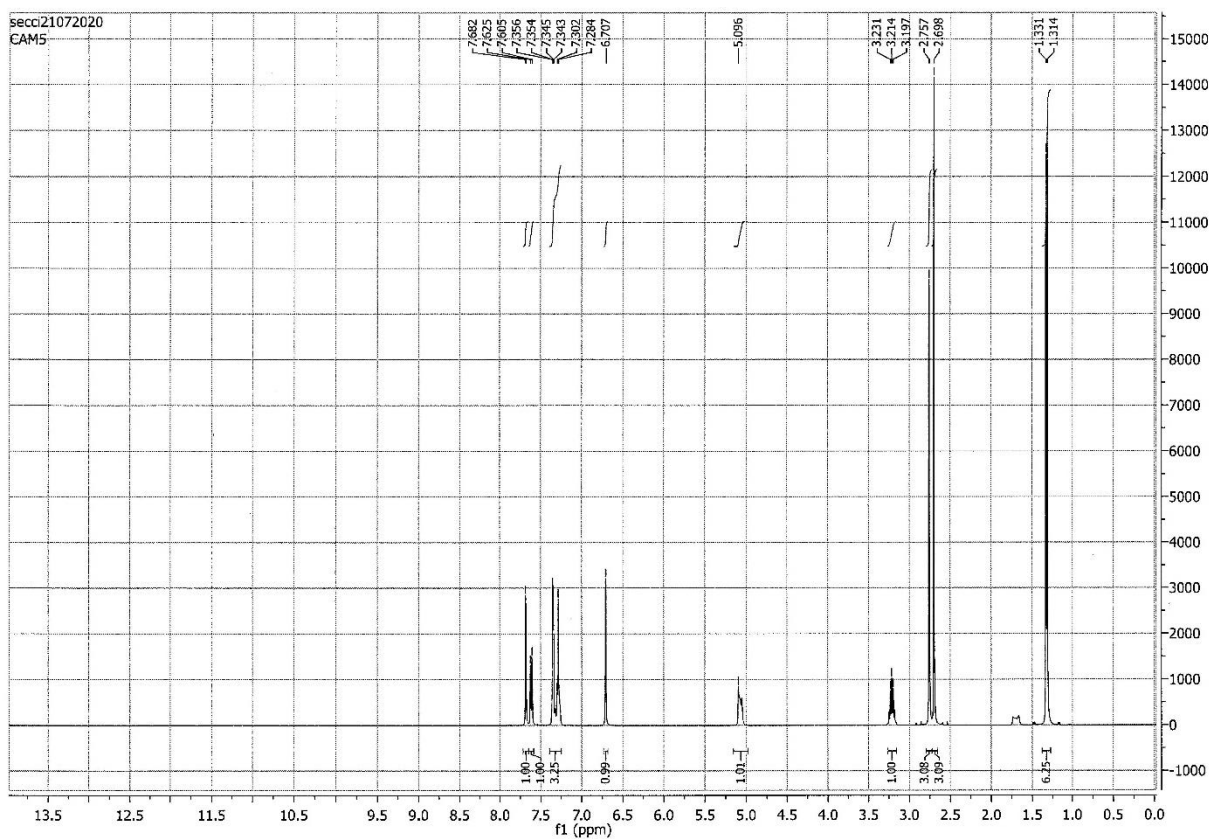

Figure S43.  $^1\text{H}$  NMR spectrum of compound 22.



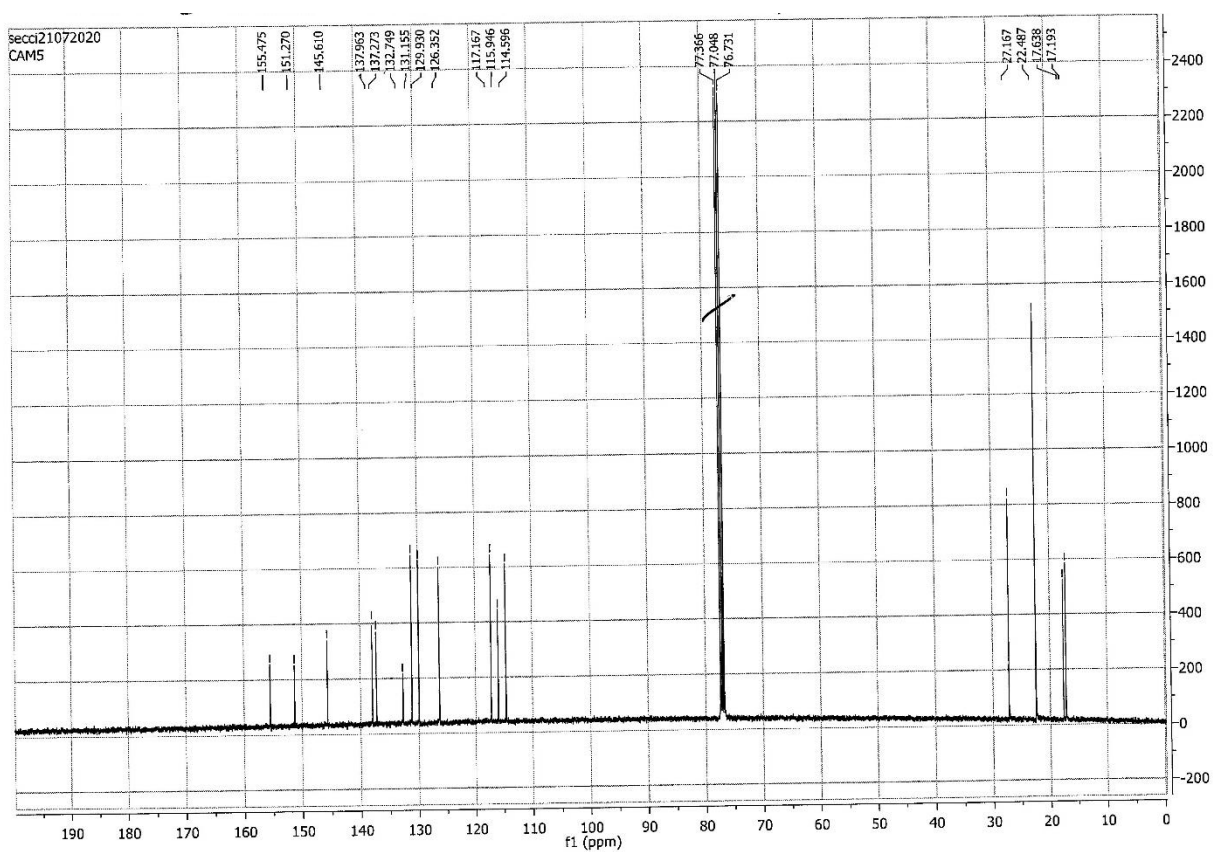

Figure S44.  $^{13}\text{C}$  NMR spectrum of compound 22.

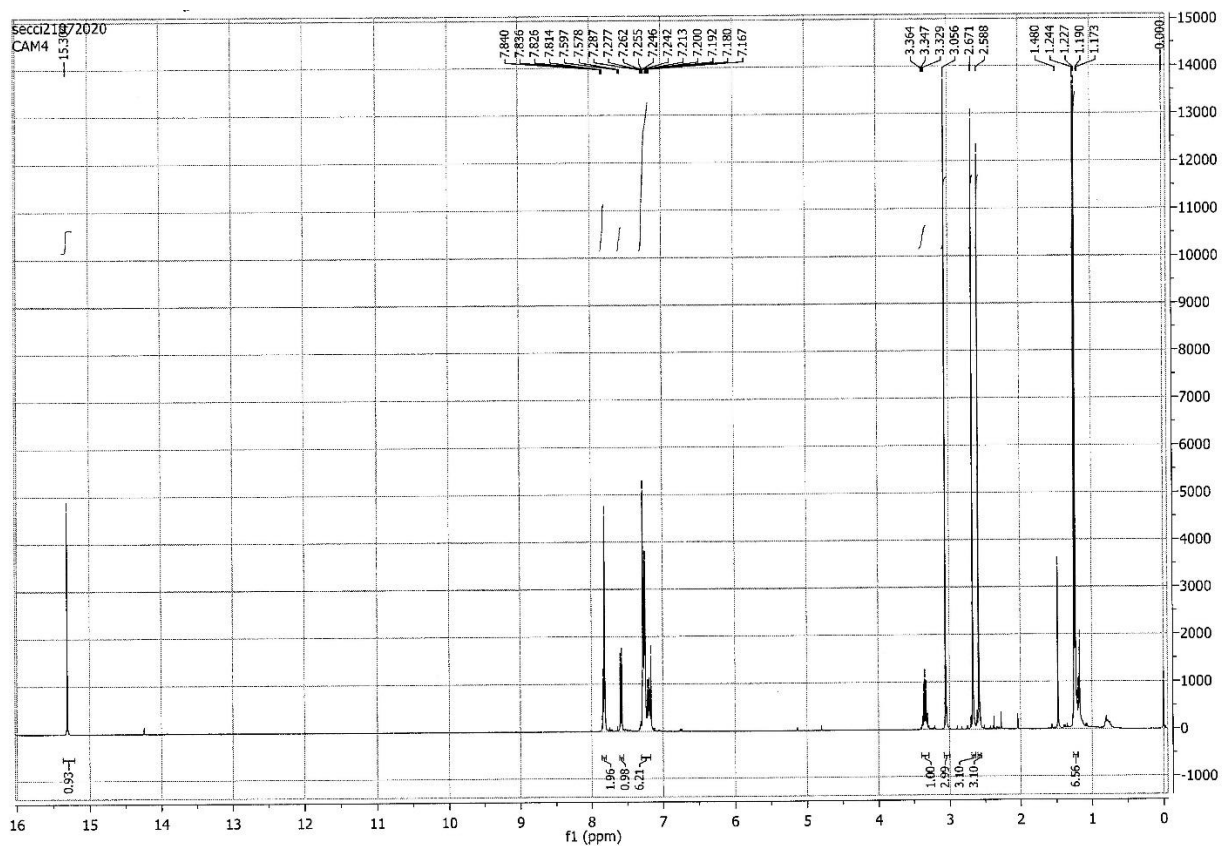

Figure S45.  $^1\text{H}$  NMR spectrum of compound 23.

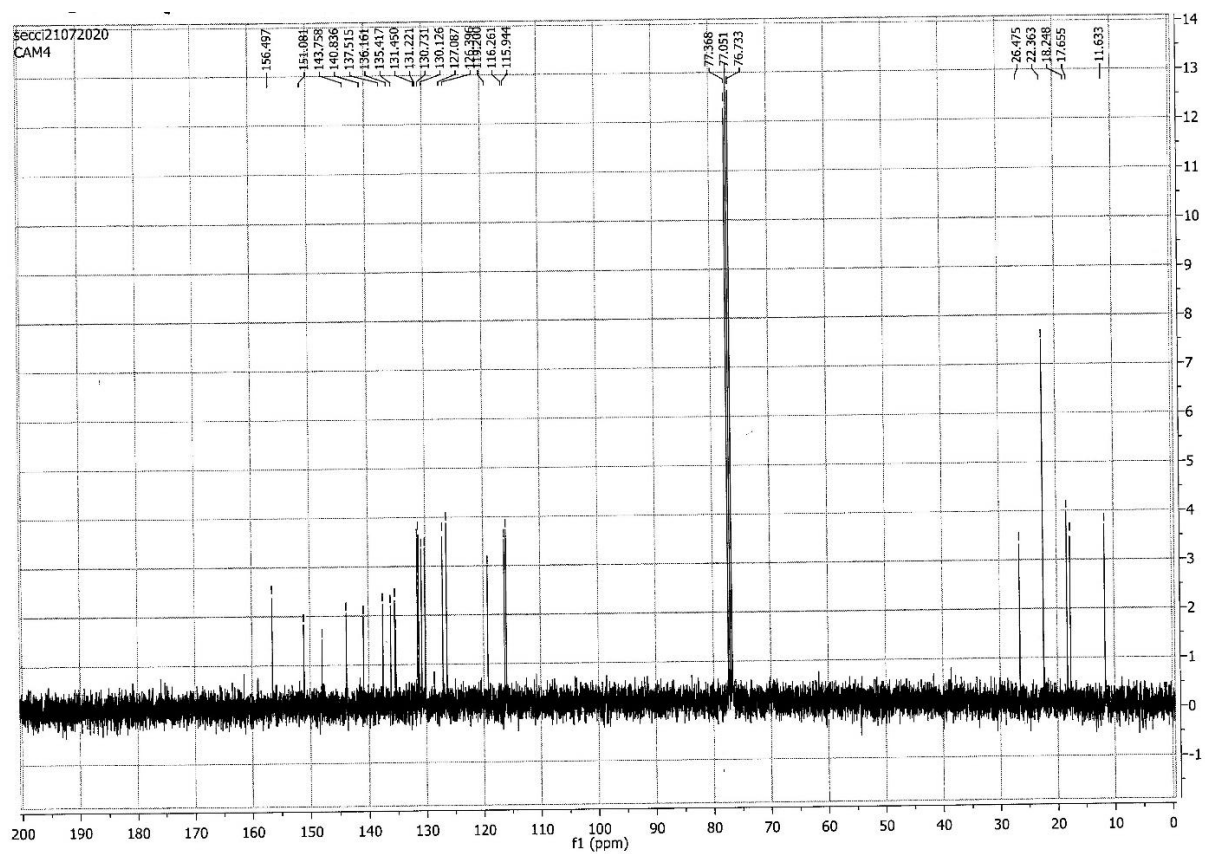

Figure S46.  $^{13}\text{C}$  NMR spectrum of compound **23**.

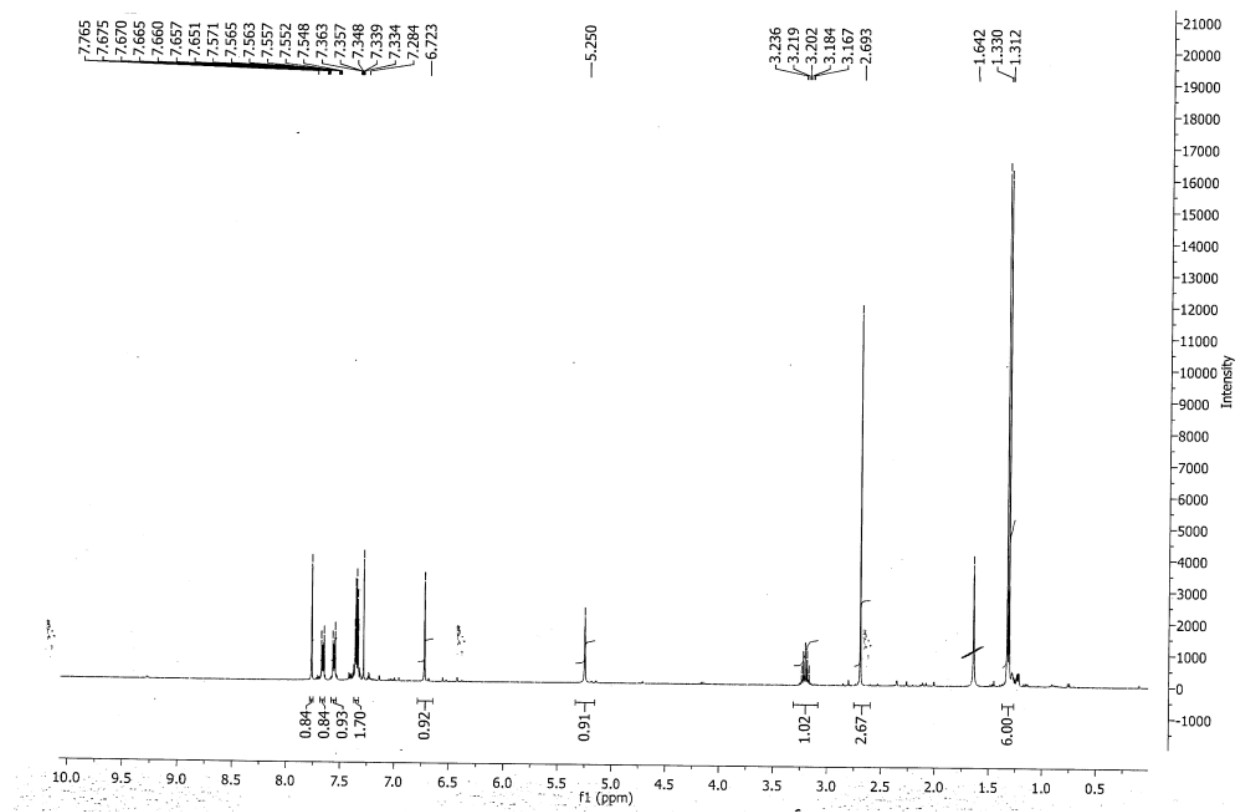

**Figure S47.**  $^1\text{H}$  NMR spectrum of compound **24**.

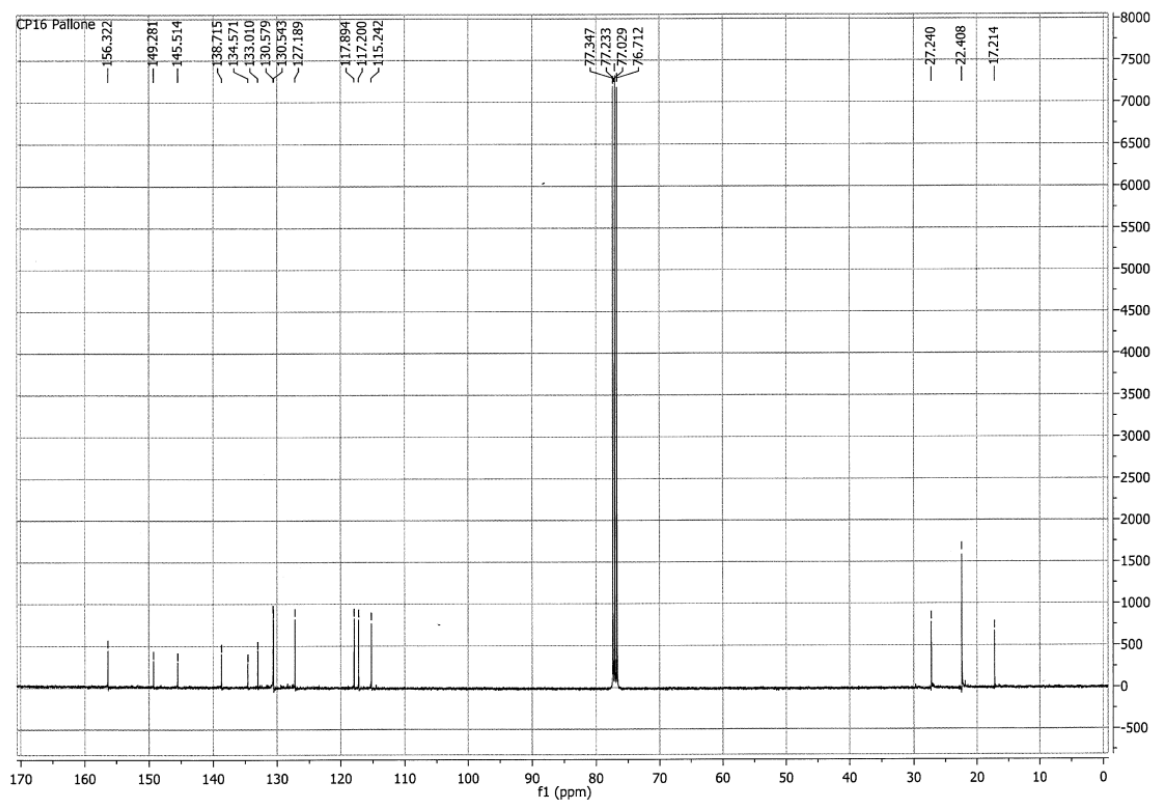

**Figure S48.**  $^{13}\text{C}$  NMR spectrum of compound **24**.

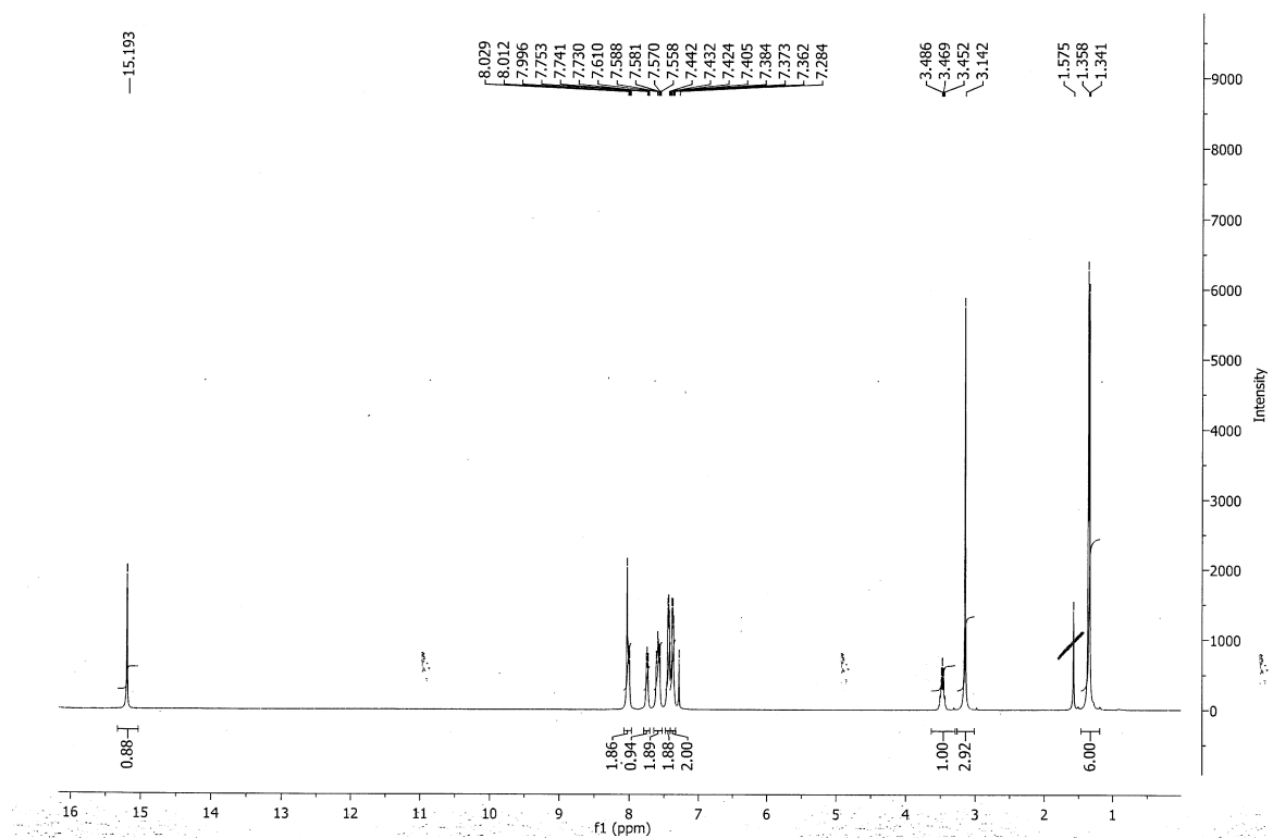

**Figure S49.**  $^1\text{H}$  NMR spectrum of compound **25**.

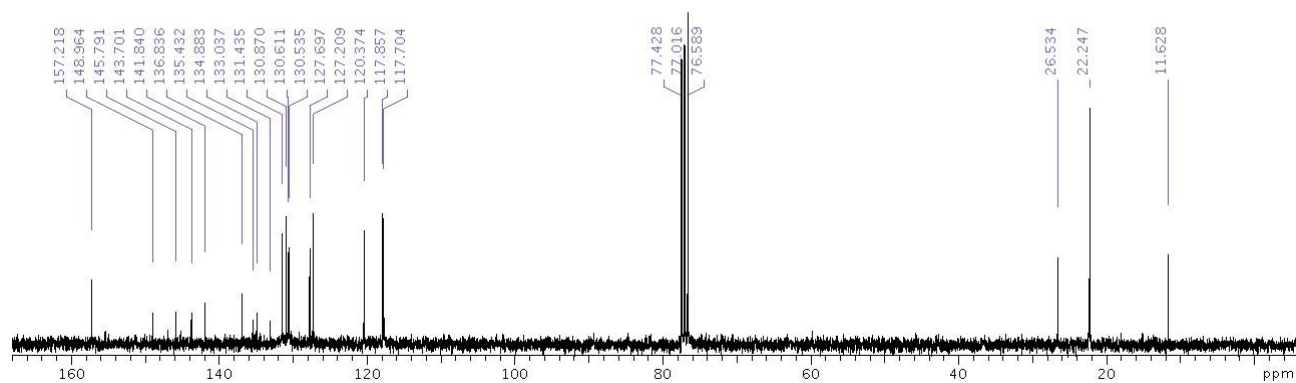

**Figure S50.**  $^1\text{H}$  NMR spectrum of compound **25**.

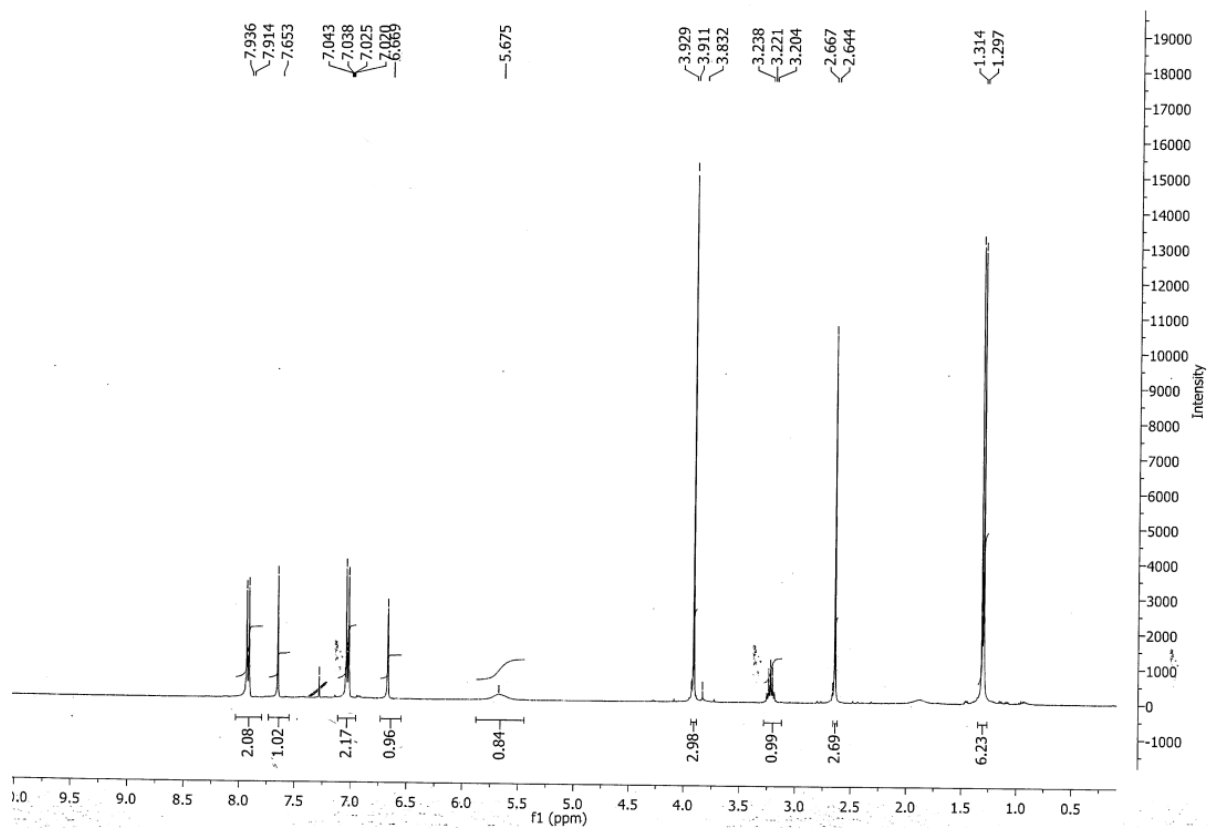

**Figure S51.**  $^1\text{H}$  NMR spectrum of compound **26**.

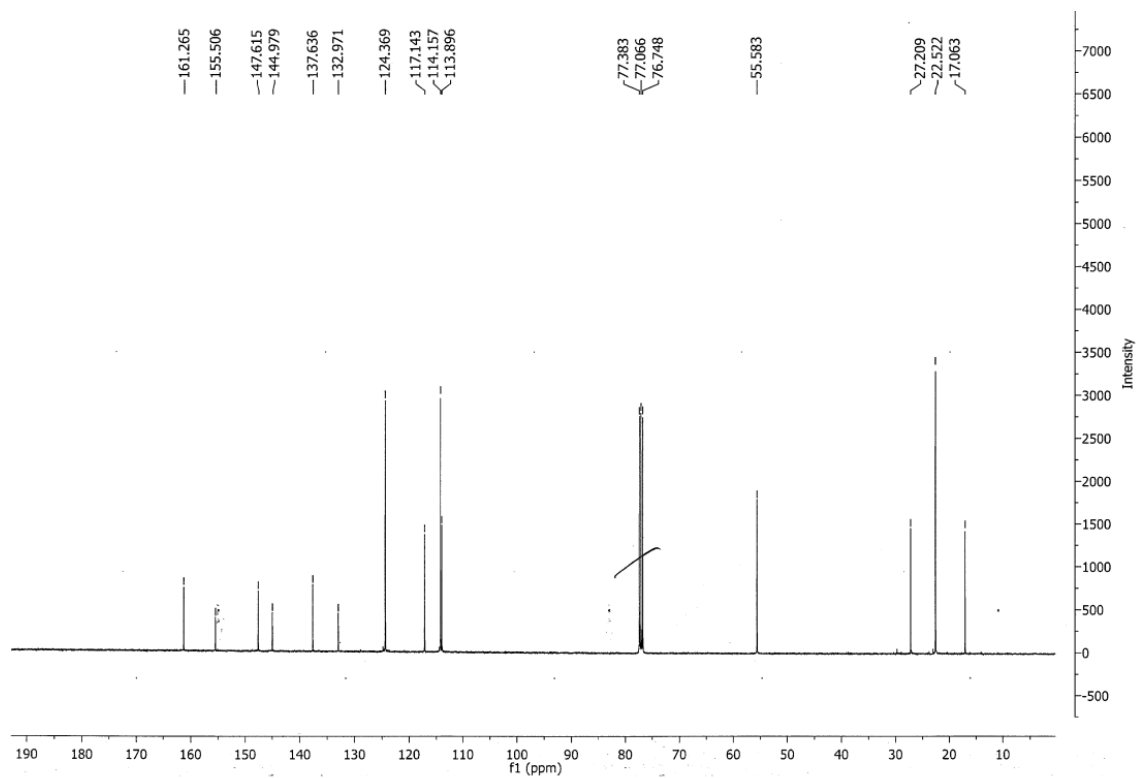

**Figure S52.**  $^{13}\text{C}$  NMR spectrum of compound **26**.

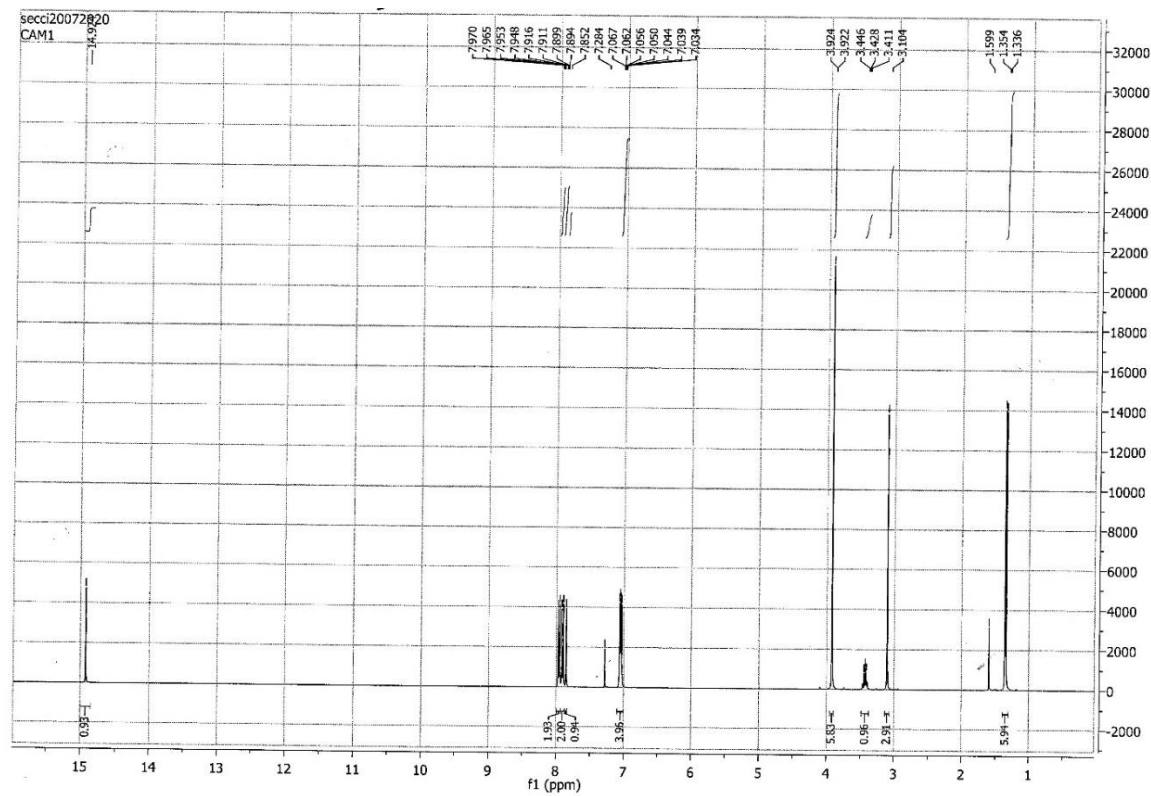

**Figure S53.**  $^1\text{H}$  NMR spectrum of compound **27**.

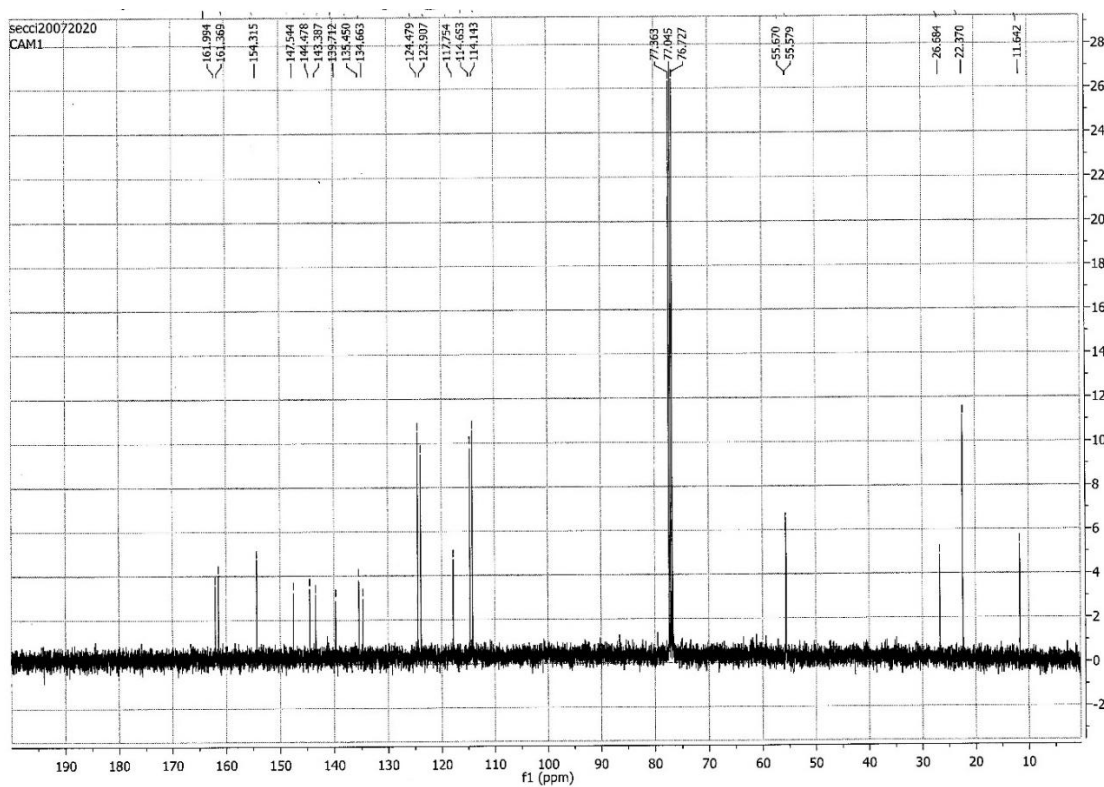

**Figure S54.**  $^1\text{H}$  NMR spectrum of compound **27**.

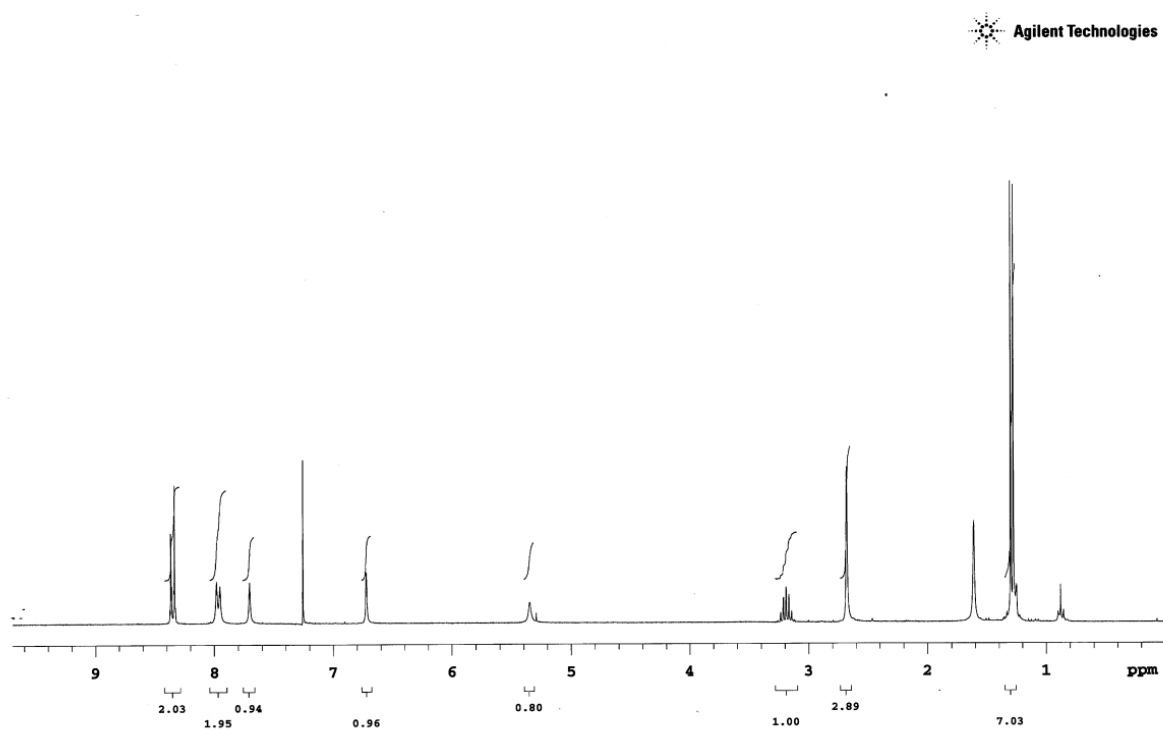

**Figure S55.**  $^1\text{H}$  NMR spectrum of compound **28**.

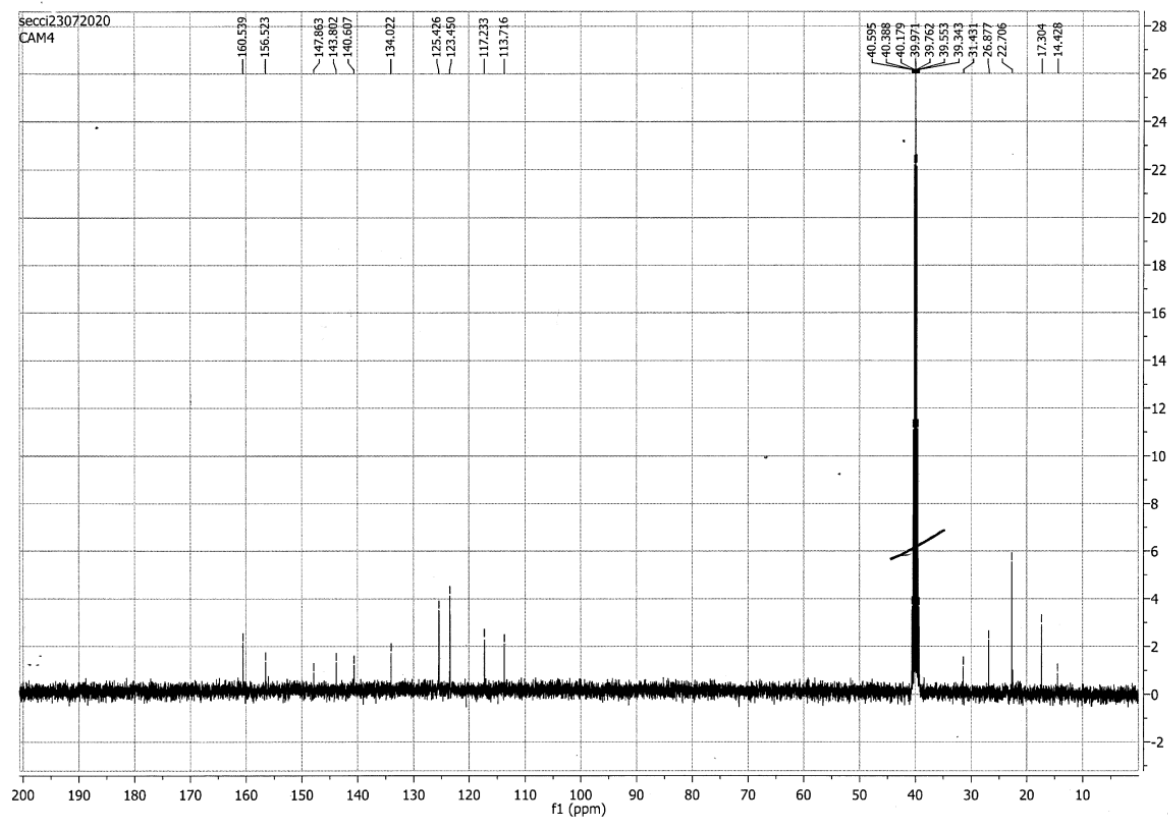

**Figure S56.**  $^{13}\text{C}$  NMR spectrum of compound **28**.

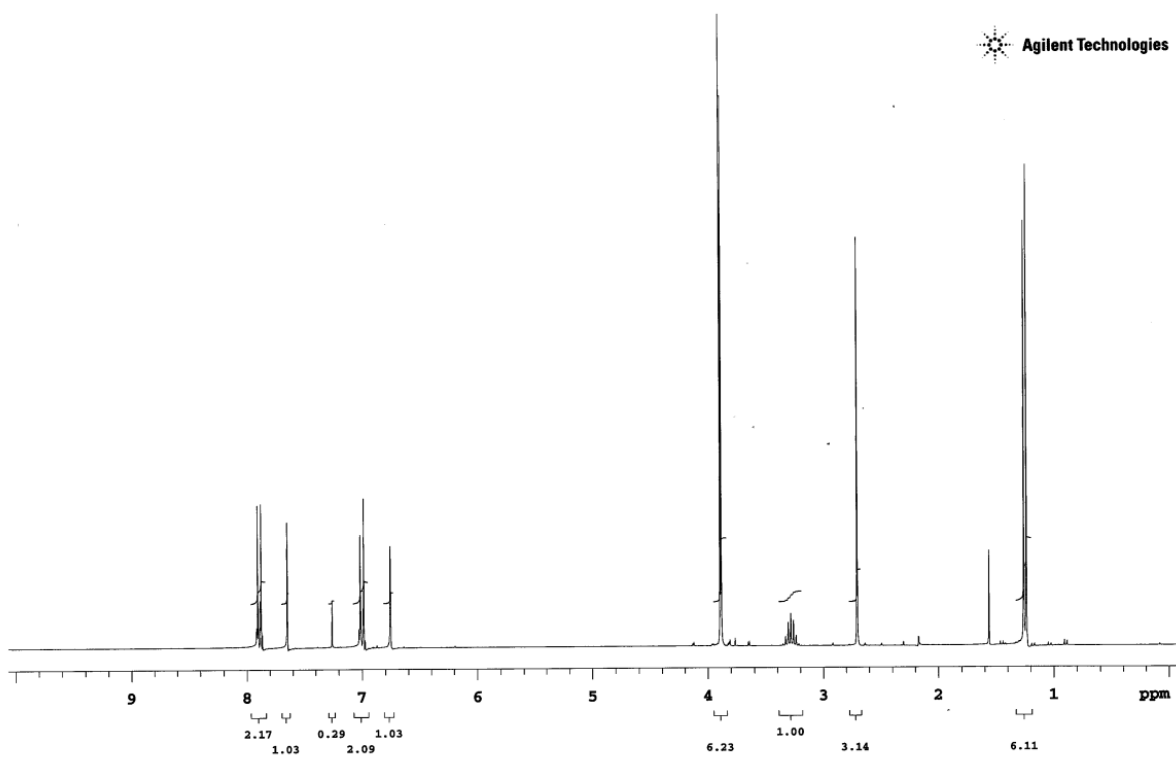

Figure S57.  $^1\text{H}$  NMR spectrum of compound 29.

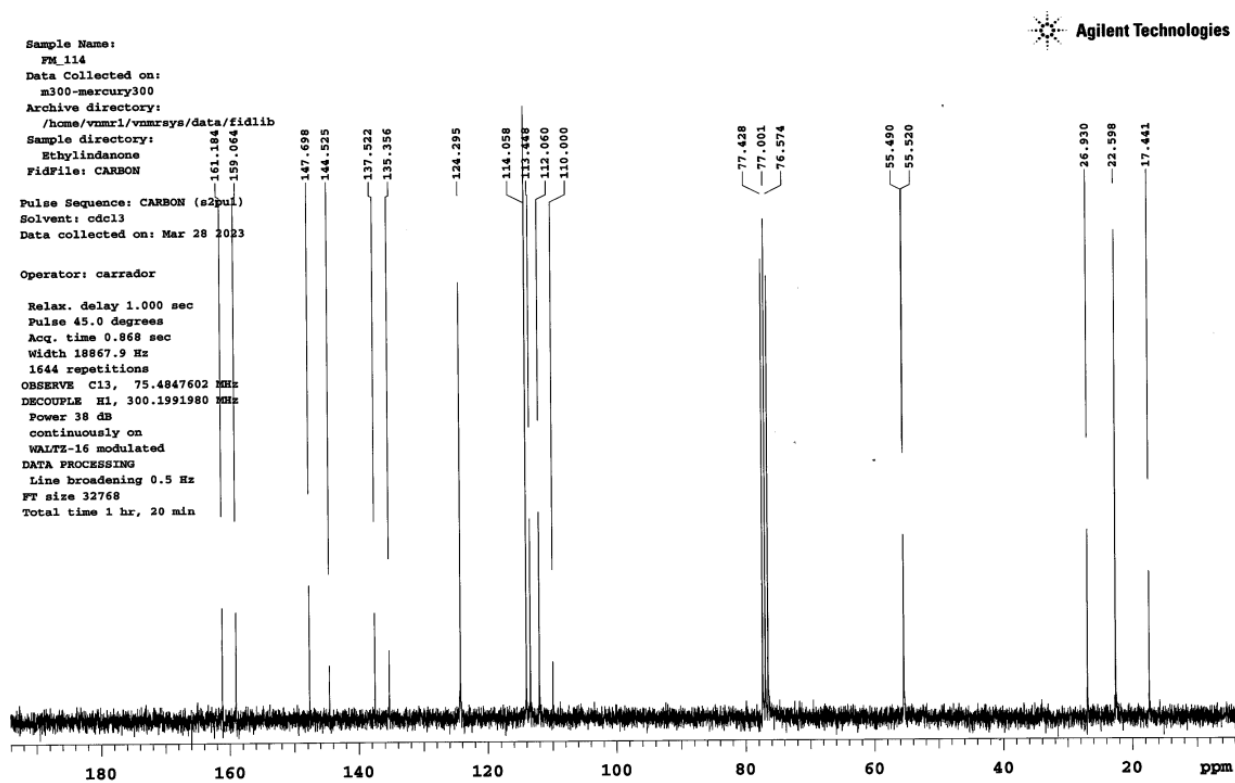

Figure S58.  $^{13}\text{C}$  NMR spectrum of compound 29.

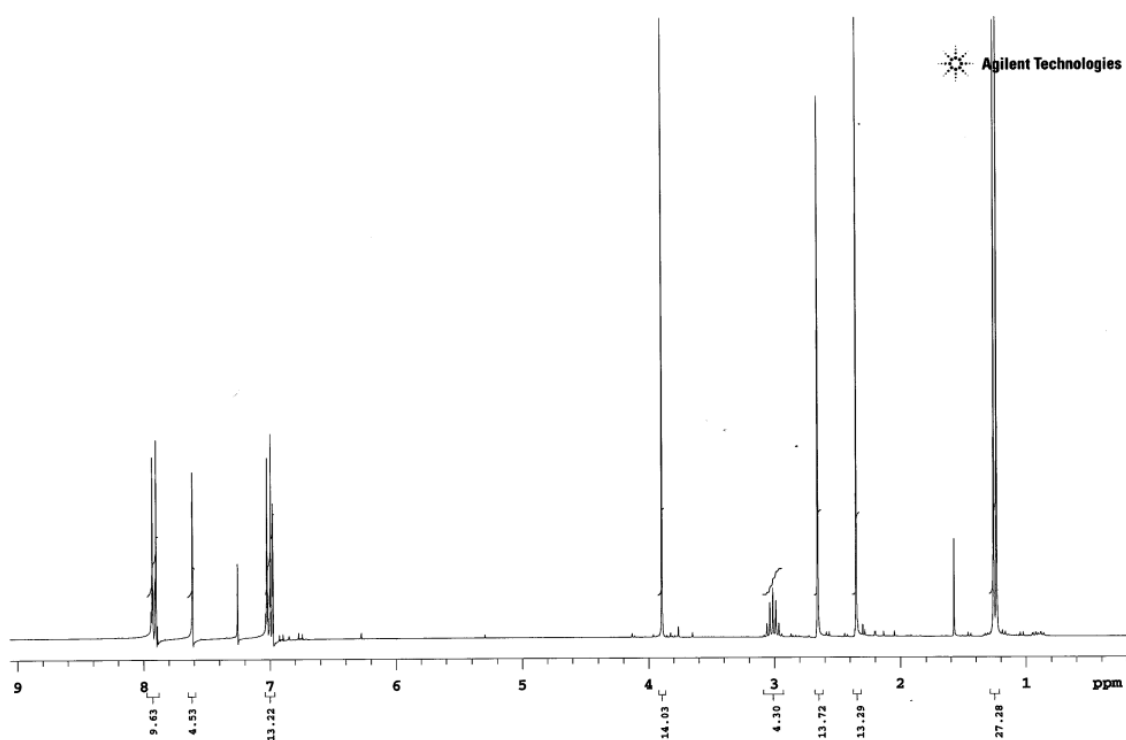



**Figure S59.**  $^1\text{H}$  NMR spectrum of compound **30**.

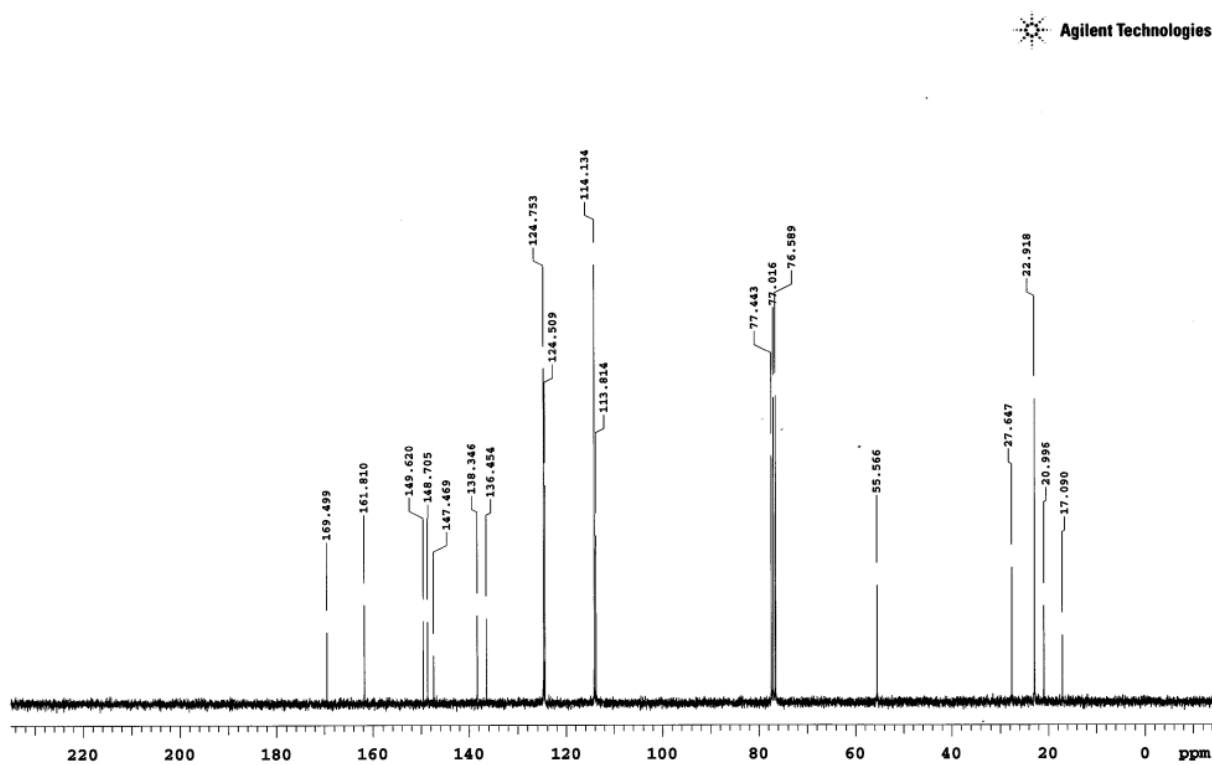

**Figure S60.**  $^{13}\text{C}$  NMR spectrum of compound **30**.

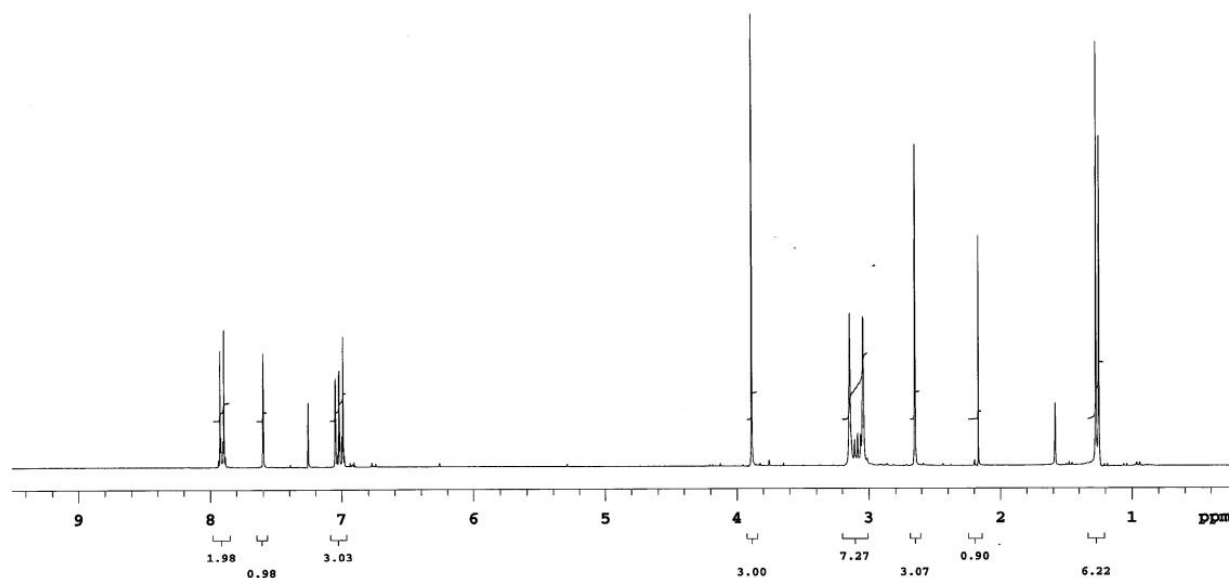

Figure S61.  $^1\text{H}$  NMR spectrum of compound 31.

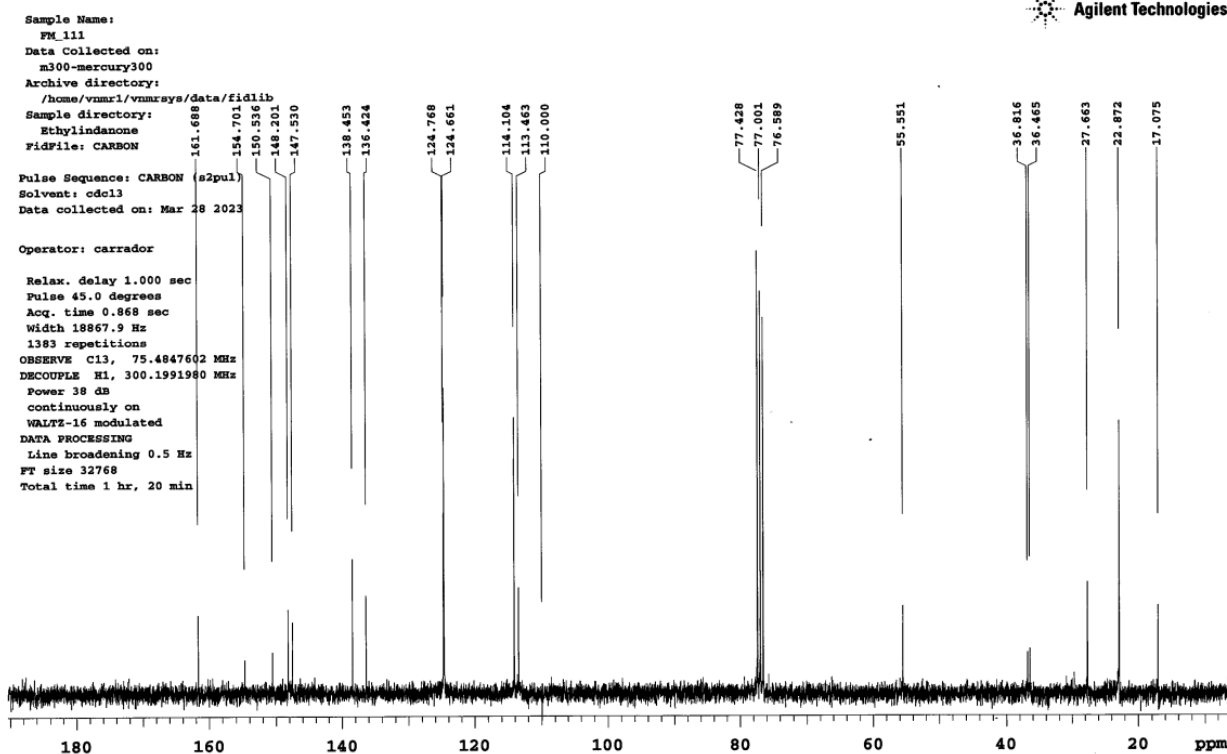

Figure S62.  $^{13}\text{C}$  NMR spectrum of compound 31.

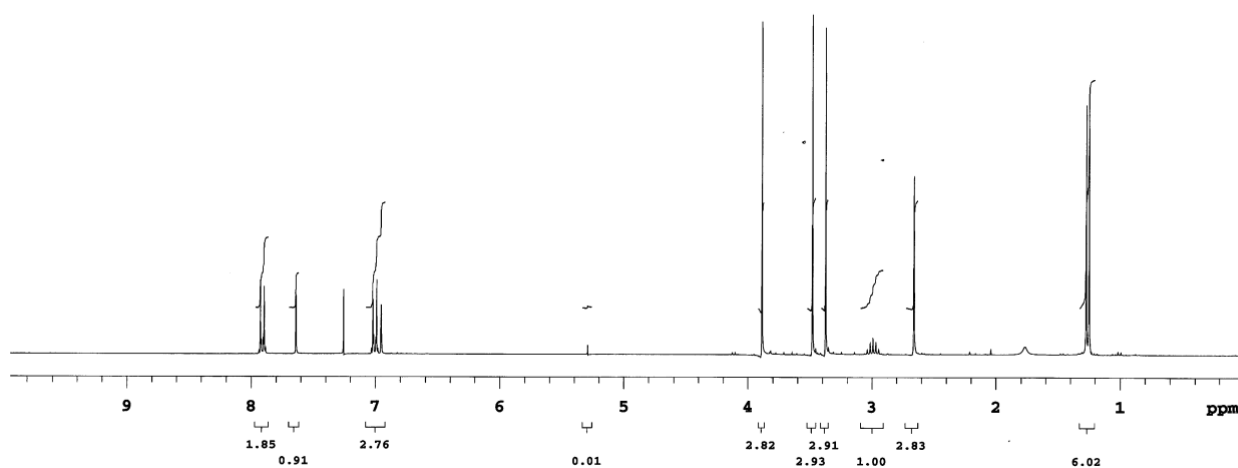

Figure S63.  $^1\text{H}$  NMR spectrum of compound 32.

Gradient Shimming

Sample Name: FM125  
 Data Collected on: m300-mercury300  
 Archive directory: /export/home/chempack/vnmrsys/data  
 Sample directory:  
 FidFile: FM125.C13  
 Pulse Sequence: CARBON (s2pul)  
 Solvent: cdcl3  
 Data collected on: Jun 9 2023  
 Operator: carrador  
 Relax. delay 1.000 sec  
 Pulse 45.0 degrees  
 Acq. time 0.868 sec  
 Width 18867.9 Hz  
 1620 repetitions  
 OBSERVE C13, 75.4847602 MHz  
 DECOUPLE H1, 300.1991980 MHz  
 Power 38 dB  
 continuously on  
 WALTZ-16 modulated  
 DATA PROCESSING  
 Line broadening 0.5 Hz  
 FT size 32768  
 Total time 1 hr, 36 min

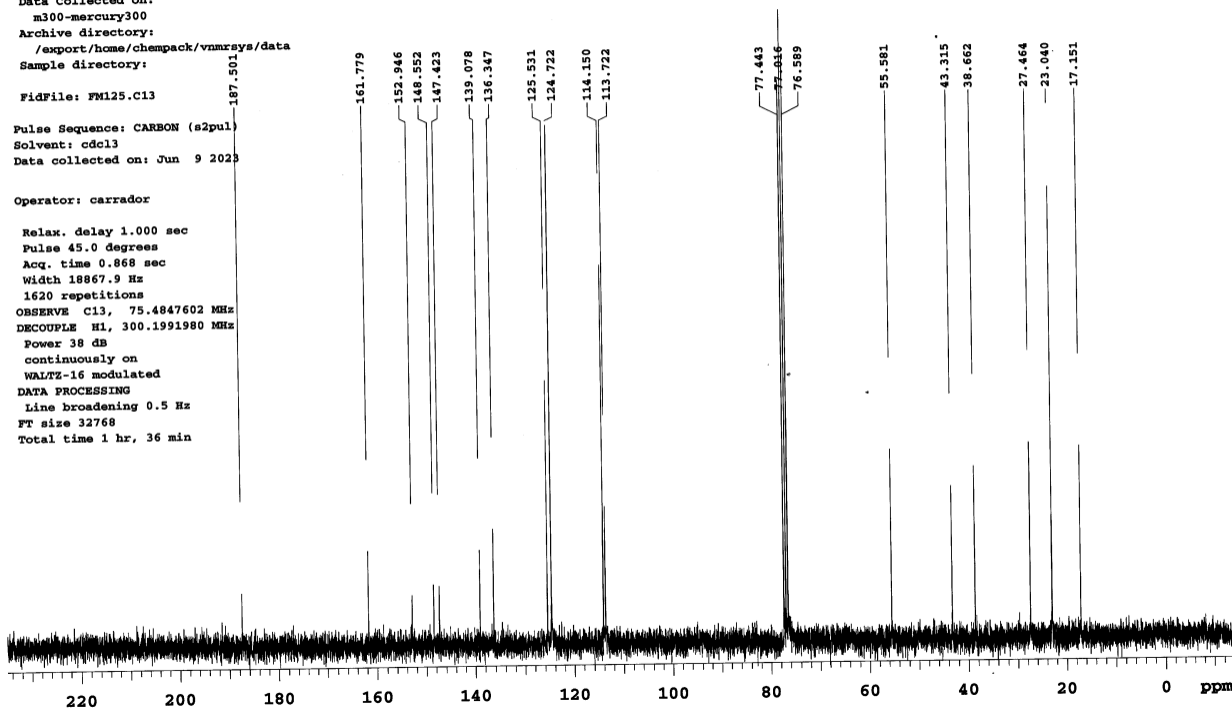

Figure S64.  $^{13}\text{C}$  NMR spectrum of compound 32.

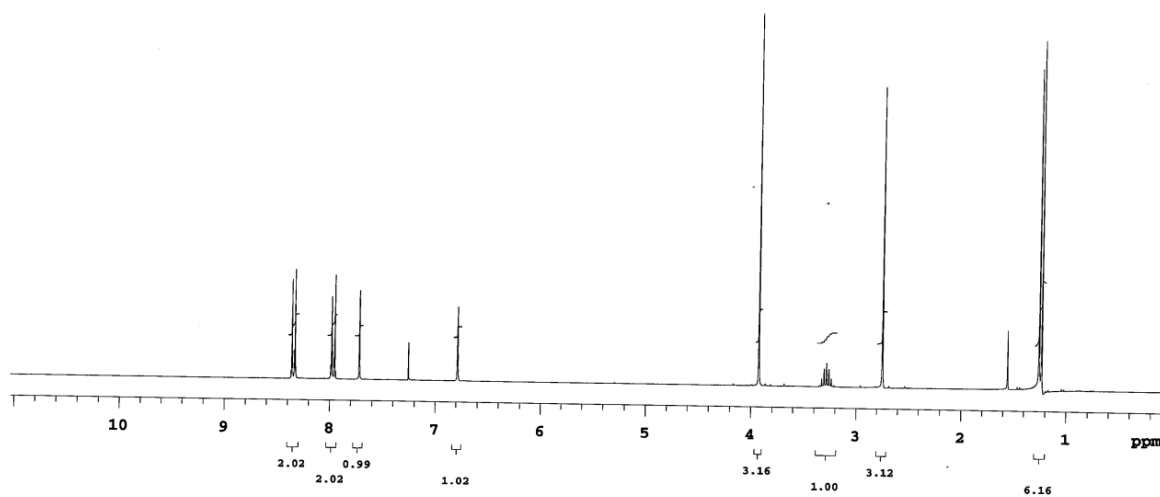

Figure S65. <sup>1</sup>H NMR spectrum of compound 33.

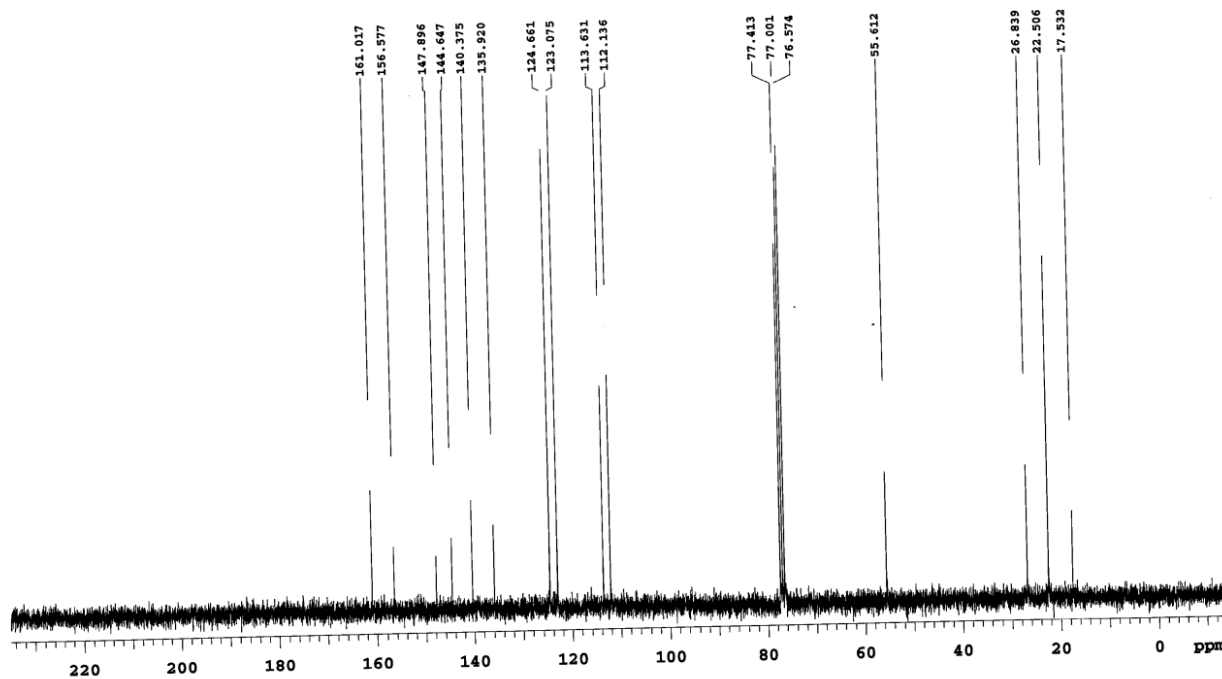

Figure S66. <sup>13</sup>C NMR spectrum of compound 33.

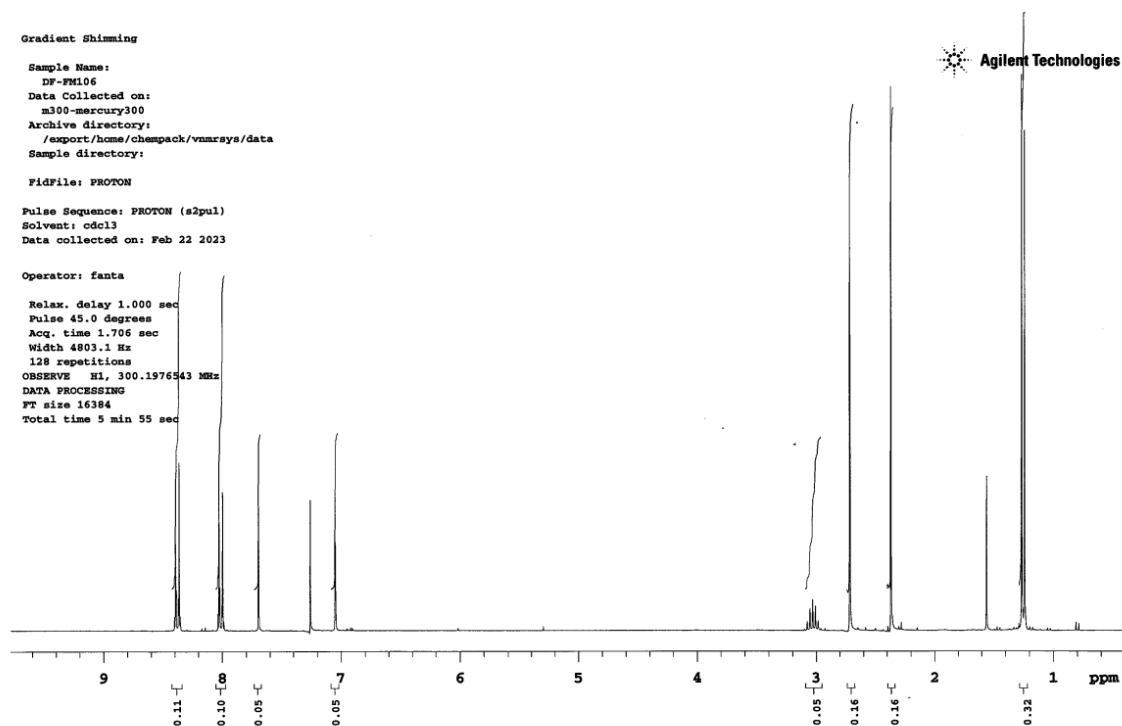

Figure S67.  $^1\text{H}$  NMR spectrum of compound **34**.

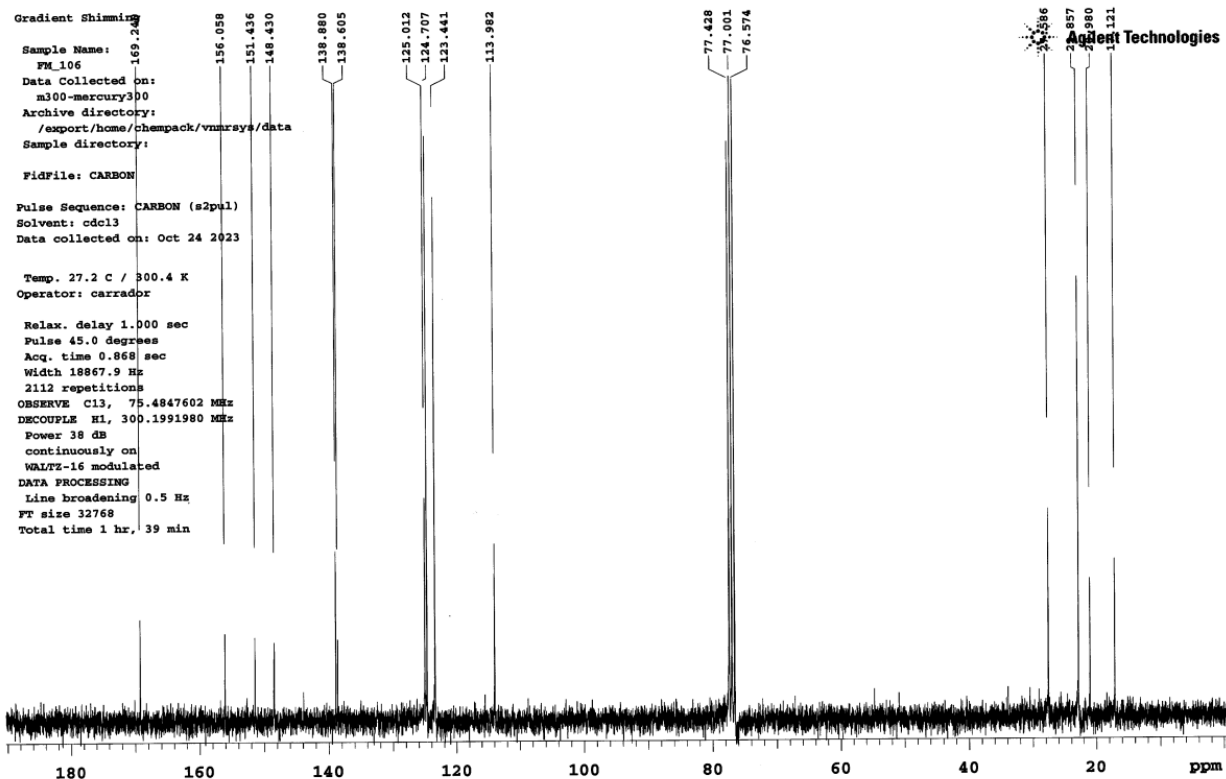

Figure S68.  $^{13}\text{C}$  NMR spectrum of compound **34**.

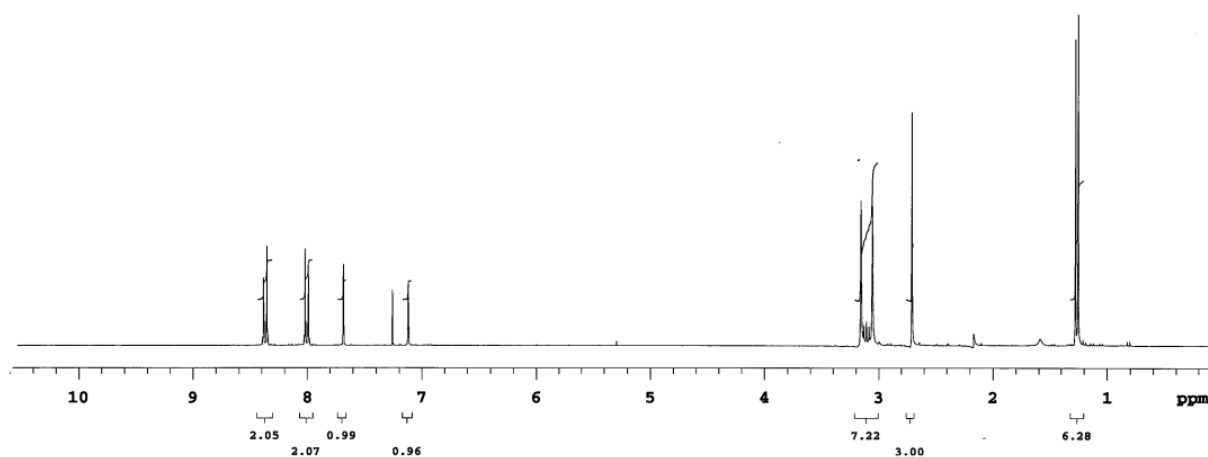

Figure S69. <sup>1</sup>H NMR spectrum of compound 35.

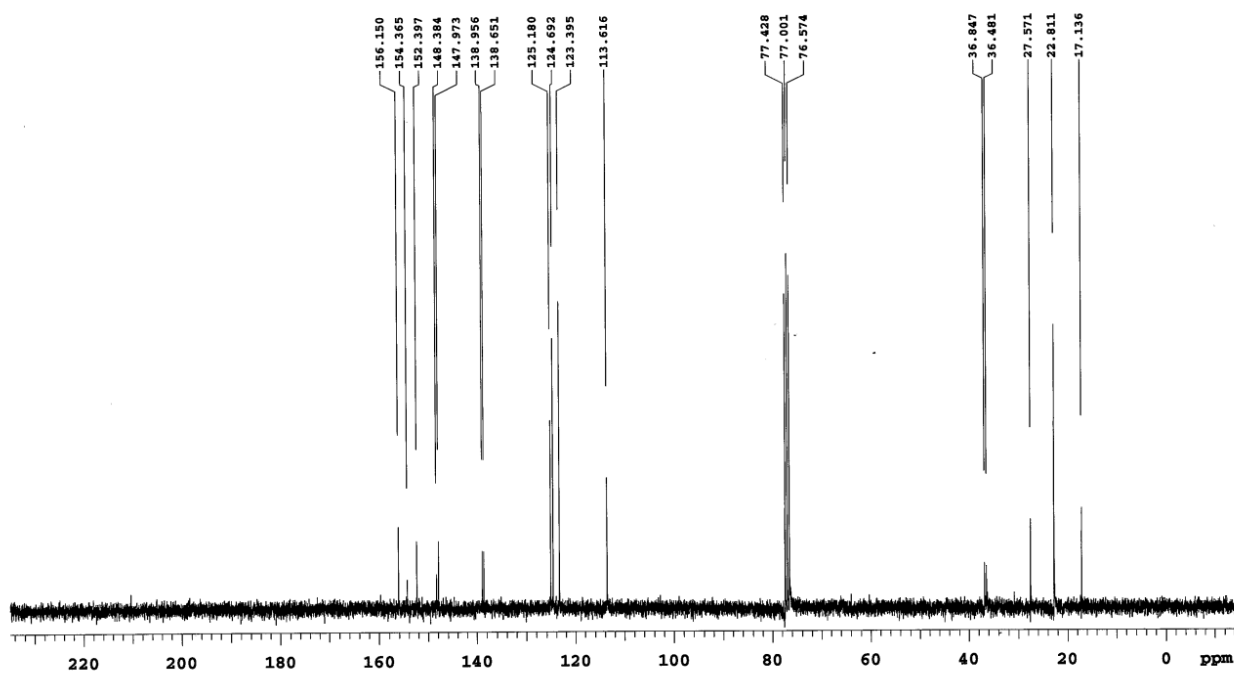

Figure S70.  $^{13}\text{C}$  NMR spectrum of compound **35**.

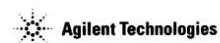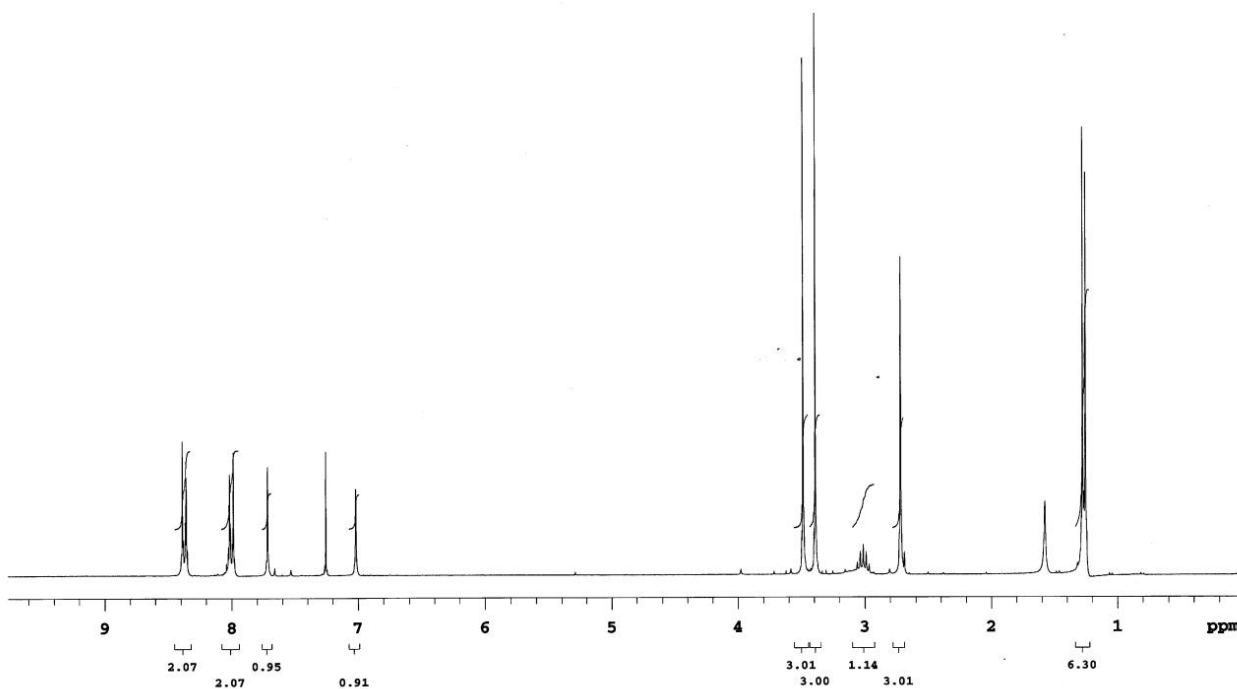

Figure S71.  $^1\text{H}$  NMR spectrum of compound **36**.

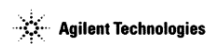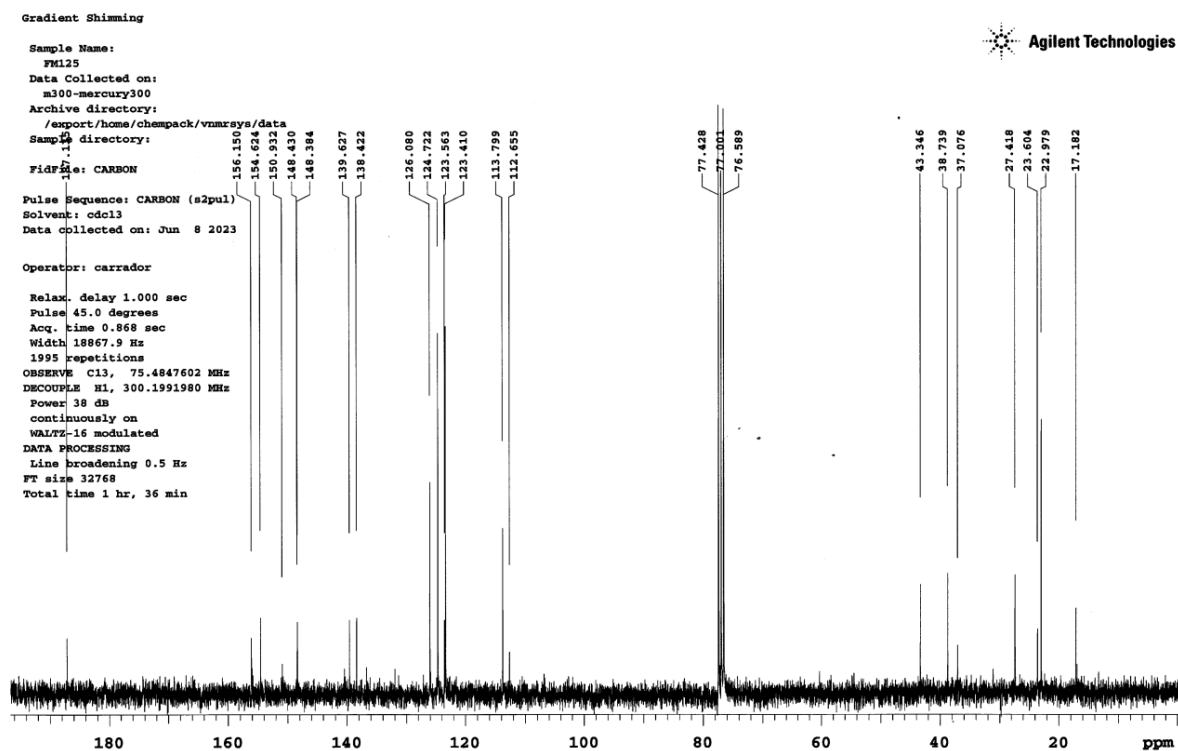

Figure S72.  $^{13}\text{C}$  NMR spectrum of compound **36**.
